# Supplementary material for: Unveiling the energetic potential of azahomocubane (AHC): a new class of potential propellants, explosives and oxidizers
Source: Royal Society of Chemistry journal article supplement (doi:10.1039/d4dt03457k), 2025-01-01
Supplement: d4dt03457k1.pdf [file d4dt03457k1.pdf]

**Electronic Supplementary  
Information  
for  
Unveiling the Energetic  
Potential of Azahomocubane  
(AHC): A New Class of  
Potential Propellants,  
Explosives and Oxidizers**

Sohan Lal<sup>a</sup>, Haixiang Gao<sup>b</sup>, Jean'ne M. Shreeve<sup>\*a</sup>

<sup>a</sup>Department of Chemistry, University of Idaho, Moscow, Idaho 83844-2343.

<sup>b</sup>Department of Applied Chemistry, China Agricultural University, Beijing, China 100193

\*To whom correspondence should be addressed. E-mail: [jshreeve@uidaho.edu](mailto:jshreeve@uidaho.edu). Fax: +1-208-885-6173.

| <b>Entry</b> | <b>Table of Contents</b>                                                                                                                                                                      | <b>Page</b>   |
|--------------|-----------------------------------------------------------------------------------------------------------------------------------------------------------------------------------------------|---------------|
| <b>1</b>     | <b>Figure S1.</b> Possible isomers of azahomocubanes and their Schlegel diagrams                                                                                                              | <b>S3</b>     |
| <b>2</b>     | <b>Table S1.</b> Calculated Total Energy ( $E_0$ ), Zero-Point Energy (ZPE), values of Thermal Correction ( $H_T$ ) and Enthalpy of Formation ( $\Delta H_f^\circ$ ) of title compounds       | <b>S4</b>     |
| <b>3</b>     | <b>Figure S2.</b> Isodesmic reactions for compounds <b>AHC-13-21</b>                                                                                                                          | <b>S5</b>     |
| <b>4</b>     | <b>Table S2.</b> The Gas phase heats of formation $\Delta H_f^\circ(\text{g})$                                                                                                                | <b>S6</b>     |
| <b>5</b>     | <b>Figure S3.</b> Computed electrostatic potential (ESP) maps of (a) RDX, (b) CL-20 and (c) HMX                                                                                               | <b>S7</b>     |
| <b>6</b>     | <b>Table S3.</b> Total surface area (SA), $\sigma_{\text{tot}}^2$ , $\sigma_{+}^2$ , balance of charges, impact sensitivity ( $h_{50}[\text{cm}]$ ) and impact energy [ $h_{50}[\text{J}]$ ]. | <b>S7</b>     |
| <b>7</b>     | <b>Table S4.</b> The standard enthalpies of combustion $\Delta H_{\text{f}(\text{combust})}$                                                                                                  | <b>S8</b>     |
| <b>8</b>     | <b>Tables S5-14.</b> Cartesian coordinates (in Å) for optimized structure of <b>AHC-12-21</b>                                                                                                 | <b>S9-19</b>  |
| <b>9</b>     | <b>Figures S4-13.</b> Computed UV- spectrum for compound <b>AHC-12-21</b>                                                                                                                     | <b>S19-24</b> |
| <b>10</b>    | <b>Figures S14-23.</b> Computed electrostatic potential (ESP) maps, scatter diagram, reduced density gradient (RDG) of <b>AHC-12-21</b> .                                                     | <b>S24-27</b> |
| <b>11</b>    | <b>References</b>                                                                                                                                                                             | <b>S27-28</b> |

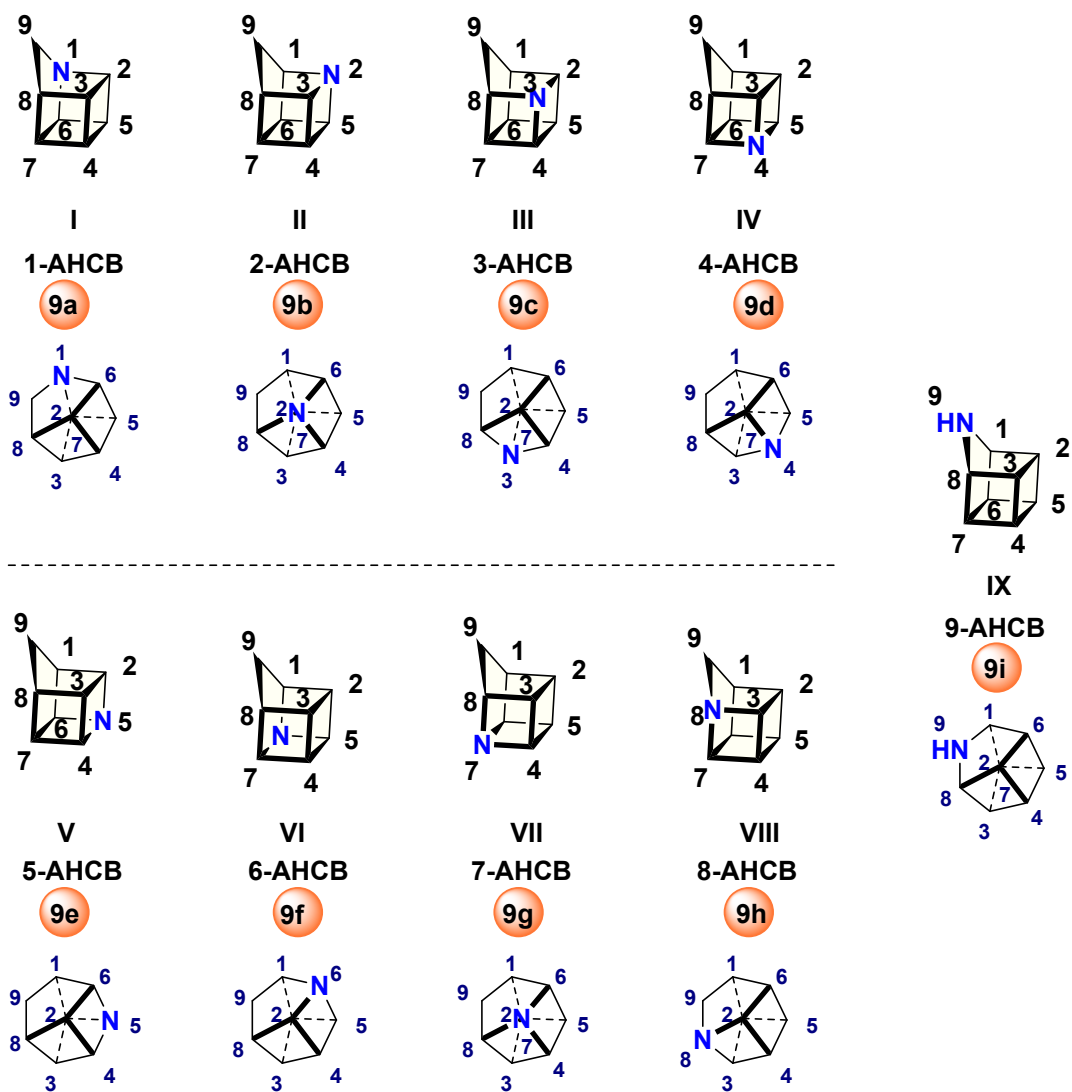

**Figure S1.** Possible isomers of azahomocubanes and their Schlegel diagrams.

**Table S1.** Calculated Total Energy ( $E_0$ ), Zero-point Energy (ZPE), values of Thermal Correction ( $H_T$ ) and Enthalpy of Formation ( $\Delta H_f^\circ$  (g)) of the compounds using B3LYP/6-31+G\*\*//MP2/6-311++G\*\* level of theory (Isodesmic)<sup>1</sup>

| <b>Compound</b>                  | $E_0$              | ZPE                | $H_T$              | $\Delta H_f^\circ$ (g) | $\Delta H_{\text{sub}}^\circ$ (g) | $\Delta H_f^\circ$ (s) | Density |
|----------------------------------|--------------------|--------------------|--------------------|------------------------|-----------------------------------|------------------------|---------|
|                                  | [Hartree/Particle] | [Hartree/Particle] | [Hartree/Particle] | <b>kJ/mol</b>          | <b>kJ/mol</b>                     | <b>kJ/mol</b>          |         |
| <b>AHC-12</b>                    | 0.005918           | 0.153015           | 0.158933           | 456.40                 | 66.18                             | 390.22                 | 1.33    |
| <b>AHC-13</b>                    | 0.008408           | 0.155459           | 0.163867           | 456.70                 | 54.34                             | 402.36                 | 1.53    |
| <b>AHC-14</b>                    | 0.009691           | 0.171605           | 0.181296           | 547.79                 | 93.43                             | 454.36                 | 1.53    |
| <b>AHC-15</b>                    | 0.009201           | 0.183551           | 0.192752           | 447.30                 | 91.28                             | 356.02                 | 1.47    |
| <b>AHC-16</b>                    | 0.01108            | 0.187383           | 0.198463           | 384.32                 | 94.50                             | 289.82                 | 1.51    |
| <b>AHC-17</b>                    | 0.010064           | 0.184083           | 0.194147           | 818.14                 | 89.73                             | 728.41                 | 1.40    |
| <b>AHC-18</b>                    | 0.015438           | 0.186342           | 0.20178            | 447.90                 | 102.45                            | 345.45                 | 1.71    |
| <b>AHC-19</b>                    | 0.016424           | 0.21543            | 0.231854           | 438.50                 | 116.05                            | 322.45                 | 1.66    |
| <b>AHC-20</b>                    | 0.028487           | 0.167456           | 0.195943           | 458.80                 | 149.76                            | 309.04                 | 2.08    |
| <b>AHC-21</b>                    | 0.031094           | 0.168077           | 0.199171           | 459.10                 | 154.16                            | 304.94                 | 2.14    |
| CH <sub>4</sub>                  | -40.3796224        | 0.044793           | 0.003812           | -74.60 <sup>a</sup>    | ----                              | ----                   | ----    |
| NH <sub>3</sub>                  | -56.43462          | 0.034377           | 0.003818           | -45.9 <sup>a</sup>     | ----                              | ----                   | ----    |
| CH <sub>3</sub> NO <sub>2</sub>  | -244.4784821       | 0.049840           | 0.005298           | -74.30 <sup>a</sup>    | ----                              | ----                   | ----    |
| CH <sub>3</sub> N <sub>3</sub>   | -203.60768         | 0.050250           | 0.005430           | 296.54                 | ----                              | ----                   | ----    |
| CH <sub>3</sub> ONO <sub>2</sub> | -319.509055        | 0.054251           | 0.005933           | -137.28 <sup>b</sup>   | ----                              | ----                   | ----    |
| CH <sub>3</sub> -CH <sub>3</sub> | -79.5716305        | 0.07461            | 0.004428           | -84.00 <sup>b</sup>    | ----                              | ----                   | ----    |
| NH <sub>2</sub> -NO <sub>2</sub> | -260.4931748       | 0.039257           | 0.004652           | -6.11 <sup>b</sup>     | ----                              | ----                   | ----    |
| CH <sub>3</sub> -NH <sub>2</sub> | -95.5938424        | 0.064026           | 0.004375           | -23.00 <sup>a</sup>    | ----                              | ----                   | ----    |

[a] Data are from Ref. [ D. R. Lide ed., CRC Handbook of Chemistry and Physics, 88<sup>th</sup> Edition (Internet Version **2008**), CRC Press/Taylor and Francis, Boca Raton, FL.]. <sup>b</sup>Obtained at G2 level.

The oxygen balance for C<sub>a</sub>H<sub>b</sub>N<sub>c</sub>O<sub>d</sub> was calculated by using equation S1.

$$\text{OB}^{\text{CO}_2}(\%) = -1600(2a-0.5b-d)/\text{MW} \quad (\text{S1})$$

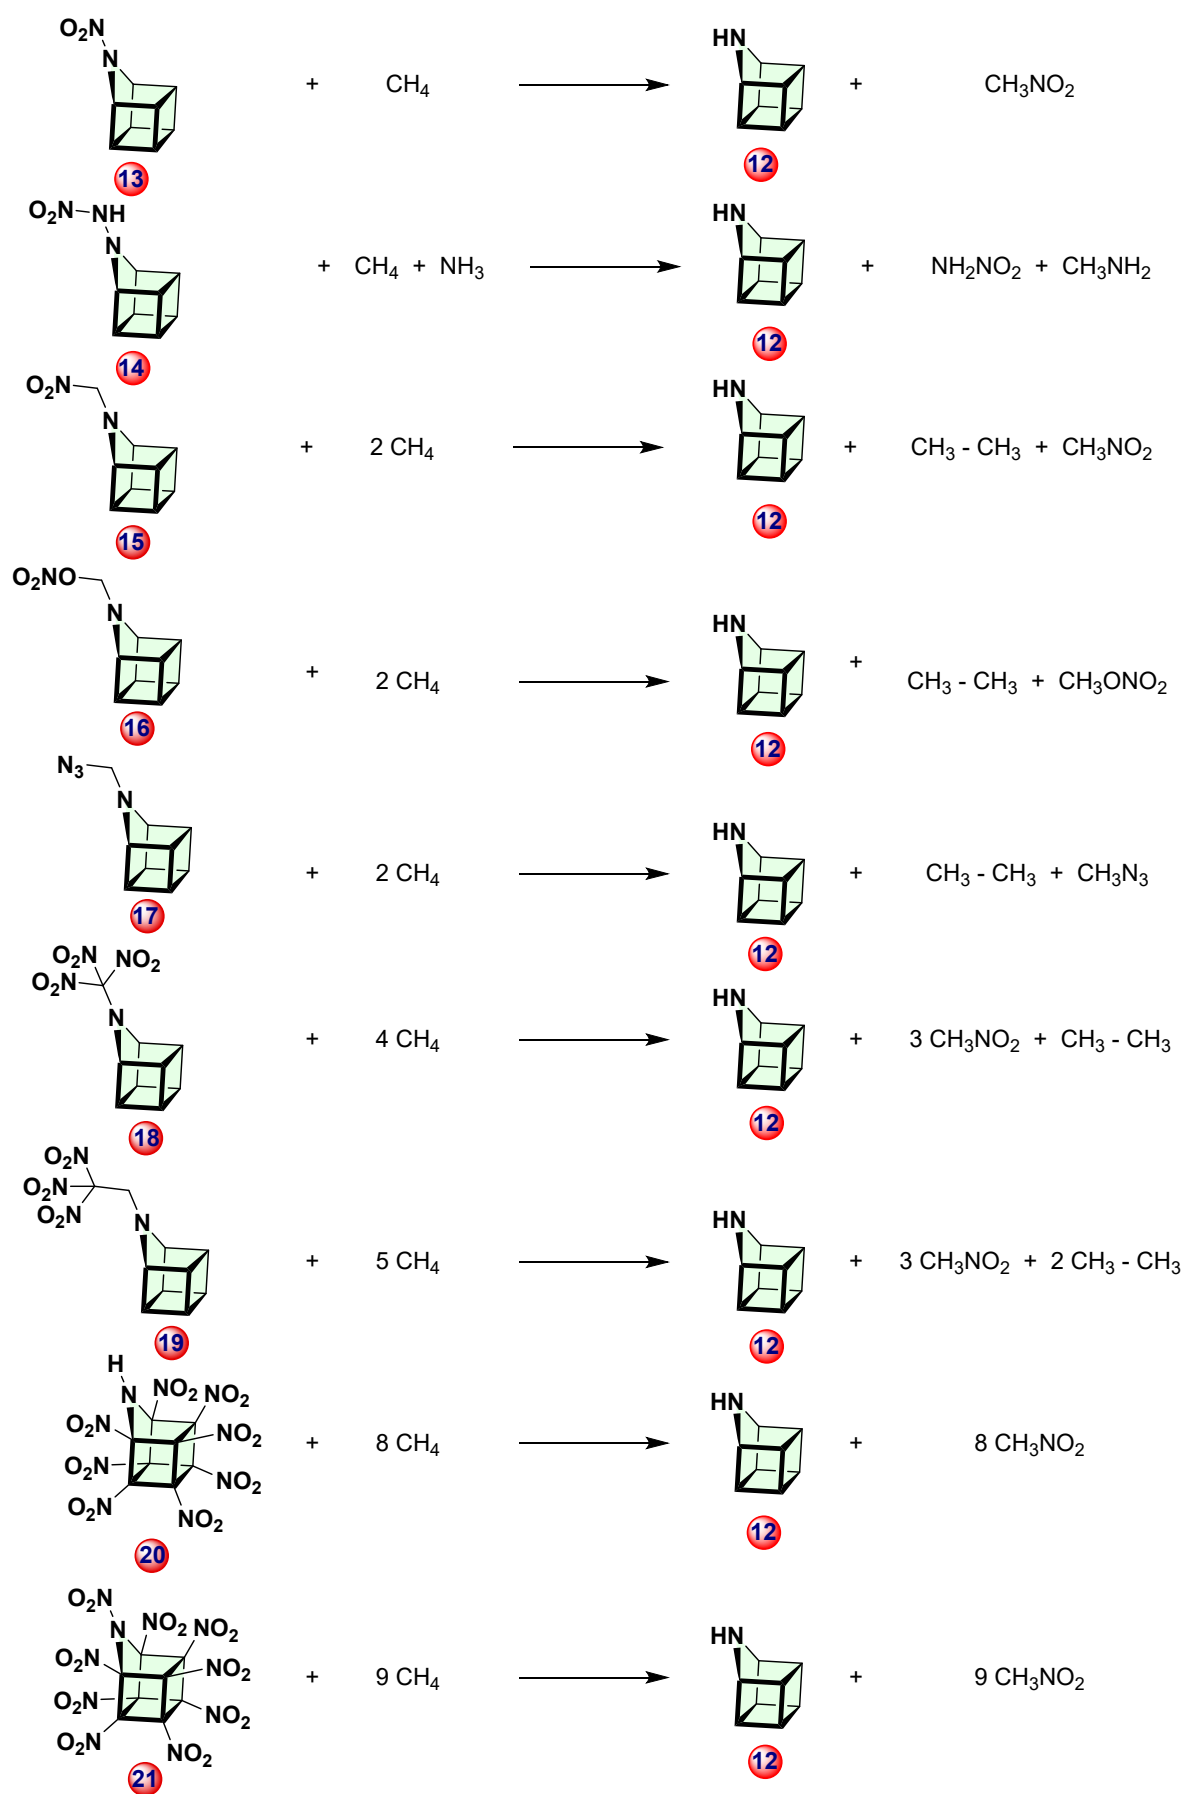

**F**

figure S2. Isodesmic reactions for compounds AHC-13-21.

**Table S2.** The Gas phase heats of formation  $\Delta H_f^\circ(\text{g})$  was predicted according to isodesmic equations S2-S10.

**For compound AHC-13**

$$\Delta H_f^\circ(\text{g})_{\text{Compd13}} = \Delta H_f^\circ(\text{g})_{\text{Compd12}} + \Delta H_f^\circ(\text{g})_{\text{CH}_3\text{-NO}_2} - \Delta H_f^\circ(\text{g})_{\text{CH}_4} \quad (\text{S2})$$

**For compound AHC-14**

$$\Delta H_f^\circ(\text{g})_{\text{Compd13}} = \Delta H_f^\circ(\text{g})_{\text{Compd12}} + \Delta H_f^\circ(\text{g})_{\text{NH}_2\text{-NO}_2} + \Delta H_f^\circ(\text{g})_{\text{CH}_3\text{-NH}_2} - \Delta H_f^\circ(\text{g})_{\text{CH}_4} - \Delta H_f^\circ(\text{g})_{\text{NH}_3} \quad (\text{S3})$$

**For compound AHC-15**

$$\Delta H_f^\circ(\text{g})_{\text{Compd13}} = \Delta H_f^\circ(\text{g})_{\text{Compd12}} + \Delta H_f^\circ(\text{g})_{\text{CH}_3\text{-CH}_3} + \Delta H_f^\circ(\text{g})_{\text{CH}_3\text{-NO}_2} - 2 \Delta H_f^\circ(\text{g})_{\text{CH}_4} \quad (\text{S4})$$

**For compound AHC-16**

$$\Delta H_f^\circ(\text{g})_{\text{Compd13}} = \Delta H_f^\circ(\text{g})_{\text{Compd12}} + \Delta H_f^\circ(\text{g})_{\text{CH}_3\text{-CH}_3} + \Delta H_f^\circ(\text{g})_{\text{CH}_3\text{-ONO}_2} - 2 \Delta H_f^\circ(\text{g})_{\text{CH}_4} \quad (\text{S5})$$

**For compound AHC-17**

$$\Delta H_f^\circ(\text{g})_{\text{Compd13}} = \Delta H_f^\circ(\text{g})_{\text{Compd12}} + \Delta H_f^\circ(\text{g})_{\text{CH}_3\text{-CH}_3} + \Delta H_f^\circ(\text{g})_{\text{CH}_3\text{-N}_3} - 2 \Delta H_f^\circ(\text{g})_{\text{CH}_4} \quad (\text{S6})$$

**For compound AHC-18**

$$\Delta H_f^\circ(\text{g})_{\text{Compd13}} = \Delta H_f^\circ(\text{g})_{\text{Compd12}} + \Delta H_f^\circ(\text{g})_{\text{CH}_3\text{-CH}_3} + 3 \Delta H_f^\circ(\text{g})_{\text{CH}_3\text{-NO}_2} - 4 \Delta H_f^\circ(\text{g})_{\text{CH}_4} \quad (\text{S7})$$

**For compound AHC-19**

$$\Delta H_f^\circ(\text{g})_{\text{Compd13}} = \Delta H_f^\circ(\text{g})_{\text{Compd12}} + 2 \Delta H_f^\circ(\text{g})_{\text{CH}_3\text{-CH}_3} + 3 \Delta H_f^\circ(\text{g})_{\text{CH}_3\text{-NO}_2} - 5 \Delta H_f^\circ(\text{g})_{\text{CH}_4} \quad (\text{S8})$$

**For compound AHC-20**

$$\Delta H_f^\circ(\text{g})_{\text{Compd13}} = \Delta H_f^\circ(\text{g})_{\text{Compd12}} + 8 \Delta H_f^\circ(\text{g})_{\text{CH}_3\text{-NO}_2} - 8 \Delta H_f^\circ(\text{g})_{\text{CH}_4} \quad (\text{S9})$$

**For compound AHC-21**

$$\Delta H_f^\circ(\text{g})_{\text{Compd13}} = \Delta H_f^\circ(\text{g})_{\text{Compd12}} + 9 \Delta H_f^\circ(\text{g})_{\text{CH}_3\text{-NO}_2} - 9 \Delta H_f^\circ(\text{g})_{\text{CH}_4} \quad (\text{S10})$$

Subsequently, their solid phase enthalpies of formation  $\Delta H_f^\circ(\text{s})$  were calculated by using equations S11-S12.<sup>2-4</sup>

$$\Delta H_f^\circ(\text{s}) = \Delta H_f^\circ(\text{g}) - \Delta H_{\text{sub}} \quad (\text{S11})$$

Where,  $\Delta H_f^\circ(\text{s})$  is solid phase enthalpy of formation,  $\Delta H_f^\circ(\text{g})$  is enthalpy of formation in gas phase and  $\Delta H_{\text{sub}}$  is represent the enthalpy of sublimation.

$$\Delta H_{\text{sub}} = a(\text{SA})^2 + b\sqrt{(\sigma_{\text{tot}}^2 \nu)} + c \quad (\text{S12})$$

Where,  $a$ ,  $b$  and  $c$  are fitting parameters, SA is the surface area of the 0.001 electron bohr<sup>-3</sup> isosurface of the electrostatic potential of the molecules,  $\sigma_{\text{tot}}^2$  is the measure of variability of electronic potential on the surface, and  $\nu$  is the degree of balance between the positive and negative charges on the isosurface.

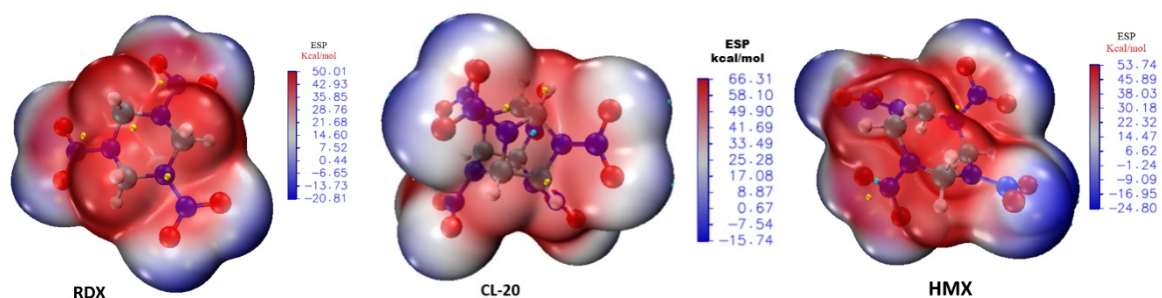

**Figure S3.** Computed electrostatic potential (ESP) maps of (a) RDX, (b) CL-20 and (c) HMX.

### Impact sensitivity

The impact sensitivity ( $h_{50}$ ) of the title compounds were predicted by using equation S13.<sup>5</sup>

$$h_{50} [\text{cm}] = \alpha\sigma^2_+ + \beta v + \gamma \quad (\text{S13})$$

Where, the coefficients  $\alpha$ ,  $\beta$ ,  $\gamma$  are -0.0064, 241.42 and -3.43, respectively. The  $\sigma^2_+$  is the measure of variability of the positive surface potentials and  $v$  is the degree of balance between the positive and negative charges on the isosurface.

Then their corresponding impact energies were calculated by using 2.5 kg hammer weight.

**Table S3.** Total surface area (SA),  $\sigma^2_{\text{tot}}$ ,  $\sigma^2_+$ , balance of charges, impact sensitivity ( $h_{50}[\text{cm}]$ ) and impact energy [ $h_{50}[\text{J}]$ ].

| Compound      | SA <sup>a</sup><br>Å <sup>2</sup> | $\sigma^2_{\text{tot}}$ <sup>b</sup><br>(kcal/mol) <sup>2</sup> | $\sigma^2_+$ <sup>c</sup><br>(kcal/mol) <sup>2</sup> | $v$ <sup>d</sup> | $h_{50}$ <sup>e</sup><br>[cm] | $h_{50}$ <sup>f</sup><br>[J] |
|---------------|-----------------------------------|-----------------------------------------------------------------|------------------------------------------------------|------------------|-------------------------------|------------------------------|
| CL-20         | 324.62                            | 239.42                                                          | 224.49                                               | 0.05844748       | 9.25                          | 2.27 (2.9)*                  |
| RDX           | 209.49                            | 214.34                                                          | 182.25                                               | 0.12731604       | 26.14                         | 6.41 (7.5)*                  |
| HMX           | 251.50                            | 246.97                                                          | 207.61                                               | 0.13397103       | 27.58                         | 6.76 (7.5)*                  |
| ONC           | 329.41                            | 161.92                                                          | 156.86                                               | 0.03025322       | 2.86                          | 0.70 (<1)*                   |
| <b>AHC-12</b> | 153.44                            | 124.77                                                          | 18.59                                                | 0.12683024       | 27.07                         | 6.64                         |
| <b>AHC-13</b> | 179.37                            | 116.11                                                          | 13.93                                                | 0.10555878       | 21.96                         | 5.38                         |
| <b>AHC-14</b> | 198.35                            | 28.80                                                           | 39.83                                                | 0.20025032       | 44.66                         | 10.95                        |
| <b>AHC-15</b> | 201.13                            | 124.40                                                          | 32.01                                                | 0.19109977       | 42.50                         | 10.42                        |
| <b>AHC-16</b> | 215.97                            | 93.10                                                           | 26.24                                                | 0.20239347       | 45.26                         | 11.10                        |
| <b>AHC-17</b> | 207.12                            | 97.96                                                           | 23.96                                                | 0.18476406       | 41.02                         | 10.06                        |
| <b>AHC-18</b> | 239.90                            | 55.58                                                           | 27.01                                                | 0.24980483       | 56.70                         | 13.90                        |
| <b>AHC-19</b> | 261.01                            | 69.77                                                           | 45.33                                                | 0.22757894       | 51.22                         | 12.56                        |
| <b>AHC-20</b> | 325.10                            | 164.69                                                          | 156.52                                               | 0.04719538       | 6.96                          | 1.71                         |
| <b>AHC-21</b> | 335.13                            | 119.93                                                          | 114.12                                               | 0.04613509       | 6.98                          | 1.71                         |

<sup>a</sup>SA = Total surface area. <sup>b</sup>Overall variance ( $\sigma^2_{\text{tot}}$ ). <sup>c</sup>Positive variance ( $\sigma^2_+$ ). <sup>d</sup>Balance of charges ( $v$ ). <sup>e</sup> $h_{50}$  [cm] = Height from where 50% probability of the dropped materials resulted in an explosion. <sup>f</sup> $h_{50}$  [J] = Predicted impact sensitivities using 2.5 kg weight of a drop-hammer. \* Experimentally measured impact sensitivity.

**Table S4.** The standard enthalpies of combustion  $\Delta H_{f(\text{combust})}$  for the title compounds was calculated by following equation

$$\Delta H_{f(\text{combust})} = \sum \Delta H_{f(\text{products})} - \sum \Delta H_{f(\text{reactants})} \quad (\text{S14})$$

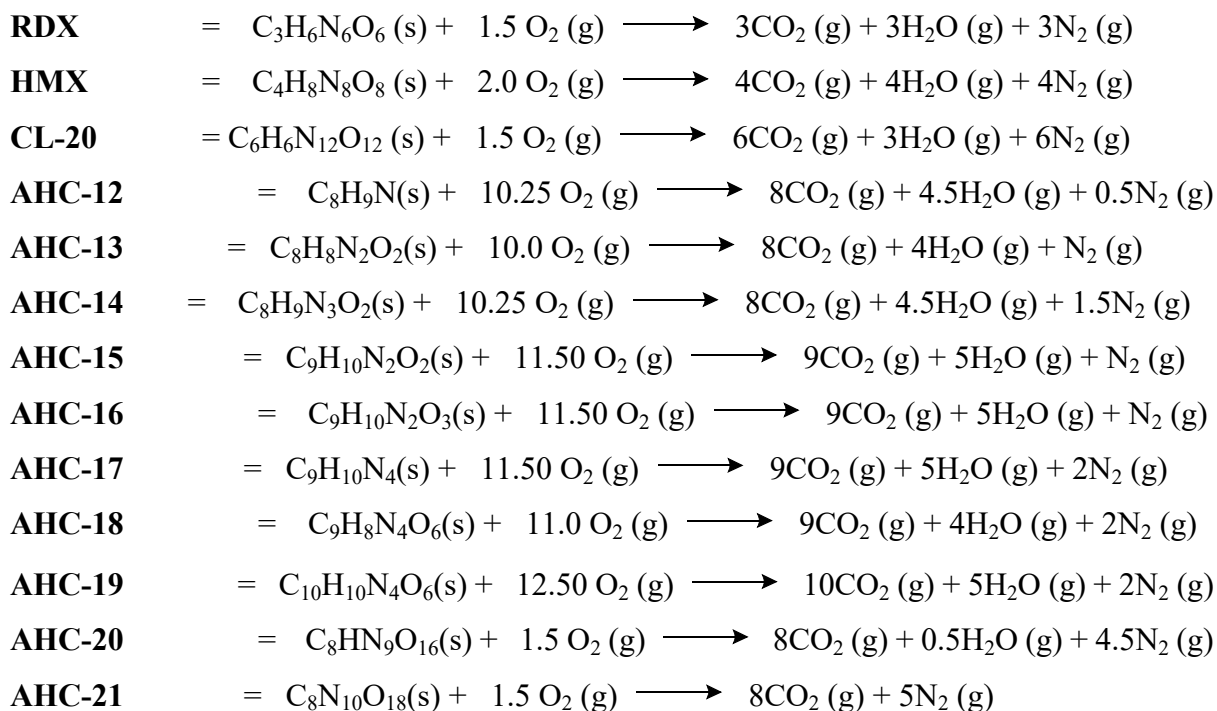

The standard enthalpy of formation for  $\text{CO}_2$  ( $\Delta H_{f(\text{CO}_2)} = -393.51 \text{ kJmol}^{-1}$ );  $\text{H}_2\text{O}$  ( $\Delta H_{f(\text{H}_2\text{O})} = -243.015 \text{ kJmol}^{-1}$ ).



**Table S5.** Cartesian coordinates (in Å) for optimized structure **AHC-12** obtained using the B3LYP/6-311++G(d,p) level of theory

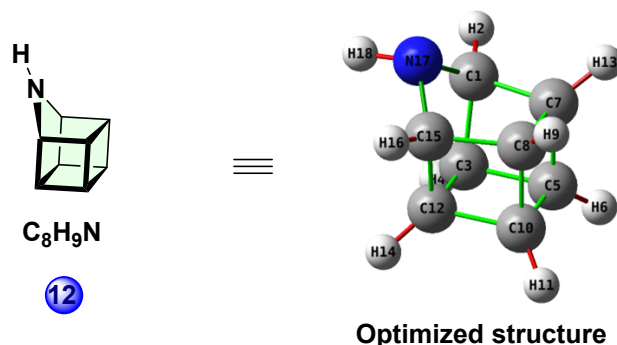

```

Zero-point correction=                0.152402 (Hartree/Particle)
Thermal correction to Energy=         0.157396
Thermal correction to Enthalpy=       0.158340
Thermal correction to Gibbs Free Energy= 0.123469
Sum of electronic and zero-point Energies= -364.816590
Sum of electronic and thermal Energies= -364.811596
Sum of electronic and thermal Enthalpies= -364.810652
Sum of electronic and thermal Free Energies= -364.845523
    
```

| Center Number | Atomic Symbol | Coordinates (Angstroms) |           |           |
|---------------|---------------|-------------------------|-----------|-----------|
|               |               | X                       | Y         | Z         |
| 1             | C             | -0.928741               | -0.158059 | 1.631573  |
| 2             | H             | -0.270430               | -0.213611 | 2.497536  |
| 3             | C             | -0.847653               | 1.121041  | 0.711061  |
| 4             | H             | -0.476555               | 2.072218  | 1.090614  |
| 5             | C             | -0.185995               | 0.284271  | -0.438024 |
| 6             | H             | 0.788588                | 0.482483  | -0.879466 |
| 7             | C             | -0.568981               | -1.003410 | 0.373092  |
| 8             | C             | -1.945536               | -1.062643 | -0.379082 |
| 9             | H             | -2.280607               | -2.003831 | -0.810563 |
| 10            | C             | -1.554503               | 0.224907  | -1.186283 |
| 11            | H             | -1.720341               | 0.374305  | -2.251269 |
| 12            | C             | -2.220934               | 1.062068  | -0.040021 |
| 13            | H             | 0.036152                | -1.904146 | 0.455747  |
| 14            | H             | -2.802704               | 1.972001  | -0.181401 |
| 15            | C             | -2.865359               | -0.241319 | 0.572811  |
| 16            | H             | -3.943494               | -0.371917 | 0.489491  |
| 17            | N             | -2.328167               | -0.470327 | 1.912005  |
| 18            | H             | -2.733216               | 0.157235  | 2.603521  |

Number of imaginary frequencies at the B3LYP/6-311++G(d,p) level = 0

**Table S6.** Cartesian coordinates (in Å) for optimized structure **AHC-13** obtained using the B3LYP/6-311++G(d,p) level of theory

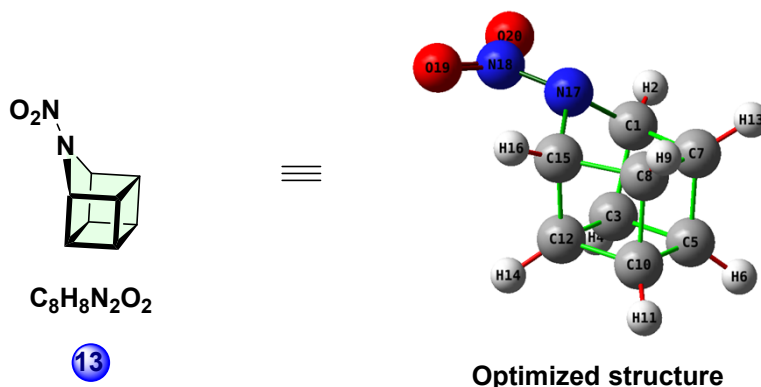

```

Zero-point correction=                0.154806 (Hartree/Particle)
Thermal correction to Energy=         0.162278
Thermal correction to Enthalpy=       0.163222
Thermal correction to Gibbs Free Energy= 0.121814
Sum of electronic and zero-point Energies= -569.363292
Sum of electronic and thermal Energies= -569.355820
Sum of electronic and thermal Enthalpies= -569.354876
Sum of electronic and thermal Free Energies= -569.396284
    
```

| Center Number | Atomic Symbol | Coordinates (Angstroms) |           |           |
|---------------|---------------|-------------------------|-----------|-----------|
|               |               | X                       | Y         | Z         |
| 1             | C             | -0.893784               | -0.093093 | 1.622254  |
| 2             | H             | -0.258161               | -0.136656 | 2.499147  |
| 3             | C             | -0.813622               | 1.147420  | 0.664274  |
| 4             | H             | -0.426741               | 2.101104  | 1.015689  |
| 5             | C             | -0.173469               | 0.260563  | -0.460013 |
| 6             | H             | 0.804931                | 0.423143  | -0.905371 |
| 7             | C             | -0.580844               | -0.990932 | 0.395166  |
| 8             | C             | -1.963045               | -1.045344 | -0.353972 |
| 9             | H             | -2.317110               | -1.993822 | -0.751183 |
| 10            | C             | -1.545185               | 0.206164  | -1.203640 |
| 11            | H             | -1.714296               | 0.323310  | -2.271217 |
| 12            | C             | -2.192655               | 1.093282  | -0.083447 |
| 13            | H             | 0.001882                | -1.902414 | 0.506368  |
| 14            | H             | -2.755864               | 2.009240  | -0.245957 |
| 15            | C             | -2.874298               | -0.171312 | 0.548251  |
| 16            | H             | -3.951222               | -0.282714 | 0.496434  |
| 17            | N             | -2.316169               | -0.353888 | 1.898035  |
| 18            | N             | -2.910552               | 0.372019  | 2.940827  |
| 19            | O             | -4.109946               | 0.592909  | 2.849087  |
| 20            | O             | -2.196000               | 0.665750  | 3.888881  |

Number of imaginary frequencies at the B3LYP/6-311++G(d,p) level = 0

**Table S7.** Cartesian coordinates (in Å) for optimized structure **AHC-14** obtained using the B3LYP/6-311++G(d,p) level of theory

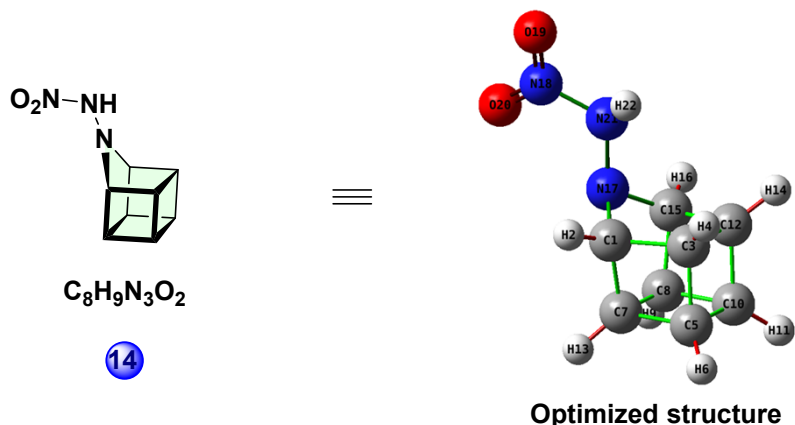

|                                              |                             |
|----------------------------------------------|-----------------------------|
| Zero-point correction=                       | 0.170998 (Hartree/Particle) |
| Thermal correction to Energy=                | 0.179752                    |
| Thermal correction to Enthalpy=              | 0.180696                    |
| Thermal correction to Gibbs Free Energy=     | 0.135726                    |
| Sum of electronic and zero-point Energies=   | -624.682197                 |
| Sum of electronic and thermal Energies=      | -624.673444                 |
| Sum of electronic and thermal Enthalpies=    | -624.672499                 |
| Sum of electronic and thermal Free Energies= | -624.717469                 |

| Center Number | Atomic Symbol | Coordinates (Angstroms) |           |           |
|---------------|---------------|-------------------------|-----------|-----------|
|               |               | X                       | Y         | Z         |
| 1             | C             | -1.375959               | -0.410180 | 1.888755  |
| 2             | H             | -1.178262               | -0.723766 | 2.912128  |
| 3             | C             | -0.695128               | 0.899693  | 1.332291  |
| 4             | H             | -0.338168               | 1.686745  | 1.994512  |
| 5             | C             | 0.212976                | 0.042564  | 0.383219  |
| 6             | H             | 1.300313                | 0.034437  | 0.399873  |
| 7             | C             | -0.705806               | -1.181954 | 0.723281  |
| 8             | C             | -1.632653               | -0.817748 | -0.497142 |
| 9             | H             | -1.926029               | -1.600914 | -1.192149 |
| 10            | C             | -0.703977               | 0.403324  | -0.827127 |
| 11            | H             | -0.382650               | 0.696531  | -1.823750 |
| 12            | C             | -1.617552               | 1.261367  | 0.115618  |
| 13            | H             | -0.374555               | -2.209630 | 0.851925  |
| 14            | H             | -1.902643               | 2.297366  | -0.056816 |
| 15            | C             | -2.689047               | 0.108424  | 0.156640  |
| 16            | H             | -3.648925               | 0.256810  | -0.330808 |
| 17            | N             | -2.804625               | -0.379321 | 1.538367  |
| 18            | N             | -4.454343               | -0.312011 | 3.254977  |
| 19            | O             | -4.803656               | 0.346713  | 4.225326  |
| 20            | O             | -4.791913               | -1.435028 | 2.965970  |
| 21            | N             | -3.615986               | 0.404511  | 2.343112  |
| 22            | H             | -3.182827               | 1.149589  | 2.887789  |

Number of imaginary frequencies at the B3LYP/6-311++G(d,p) level = 0

**Table S8.** Cartesian coordinates (in Å) for optimized structure **AHC-15** obtained using the B3LYP/6-311++G(d,p) level of theory

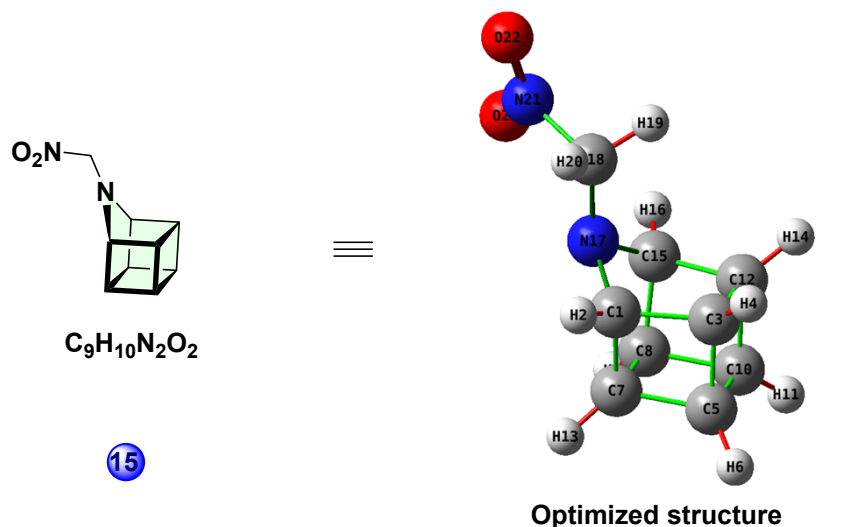

|                                              |                             |
|----------------------------------------------|-----------------------------|
| Zero-point correction=                       | 0.182761 (Hartree/Particle) |
| Thermal correction to Energy=                | 0.191859                    |
| Thermal correction to Enthalpy=              | 0.192803                    |
| Thermal correction to Gibbs Free Energy=     | 0.146068                    |
| Sum of electronic and zero-point Energies=   | -608.666134                 |
| Sum of electronic and thermal Energies=      | -608.657036                 |
| Sum of electronic and thermal Enthalpies=    | -608.656092                 |
| Sum of electronic and thermal Free Energies= | -608.702827                 |

| Center Number | Atomic Symbol | Coordinates (Angstroms) |           |           |
|---------------|---------------|-------------------------|-----------|-----------|
|               |               | X                       | Y         | Z         |
| 1             | C             | -0.790181               | -0.040923 | 1.578049  |
| 2             | H             | -0.065840               | -0.047214 | 2.391239  |
| 3             | C             | -0.804165               | 1.184273  | 0.583094  |
| 4             | H             | -0.412538               | 2.158482  | 0.871664  |
| 5             | C             | -0.235329               | 0.284117  | -0.567444 |
| 6             | H             | 0.696244                | 0.461610  | -1.099910 |
| 7             | C             | -0.534620               | -0.955129 | 0.347834  |
| 8             | C             | -1.969324               | -1.067407 | -0.280871 |
| 9             | H             | -2.327516               | -2.034995 | -0.624809 |
| 10            | C             | -1.661768               | 0.173246  | -1.190610 |
| 11            | H             | -1.921560               | 0.261145  | -2.242993 |
| 12            | C             | -2.236475               | 1.072953  | -0.041530 |
| 13            | H             | 0.082725                | -1.846757 | 0.433616  |
| 14            | H             | -2.833905               | 1.971109  | -0.188734 |
| 15            | C             | -2.818082               | -0.200503 | 0.688990  |
| 16            | H             | -3.894565               | -0.351619 | 0.712015  |
| 17            | N             | -2.165363               | -0.328416 | 1.993247  |
| 18            | C             | -2.682195               | 0.427186  | 3.076986  |
| 19            | H             | -3.219200               | 1.348531  | 2.813022  |
| 20            | H             | -1.914973               | 0.663141  | 3.811403  |
| 21            | N             | -3.747950               | -0.356990 | 3.883555  |
| 22            | O             | -3.978915               | 0.081317  | 5.001226  |
| 23            | O             | -4.306404               | -1.297695 | 3.356004  |

Number of imaginary frequencies at the B3LYP/6-311++G(d,p) level = 0

**Table S9.** Cartesian coordinates (in Å) for optimized structure **AHC-16** obtained using the B3LYP/6-311++G(d,p) level of theory

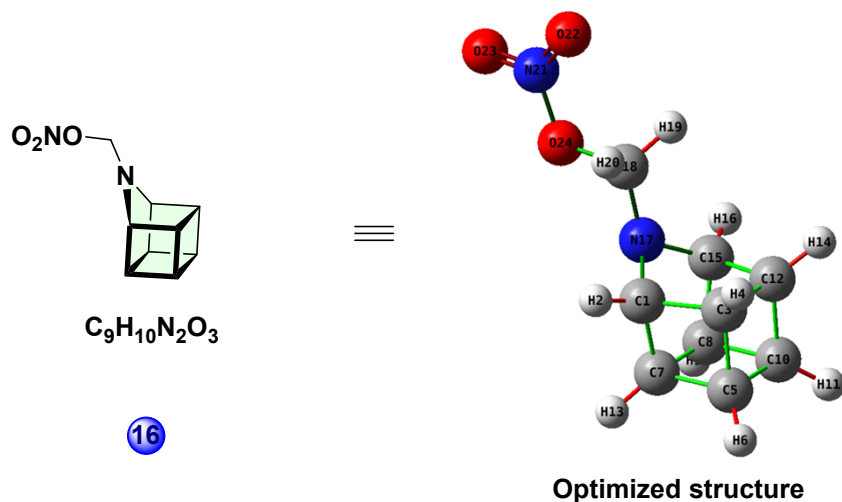

|                                              |                             |
|----------------------------------------------|-----------------------------|
| Zero-point correction=                       | 0.186649 (Hartree/Particle) |
| Thermal correction to Energy=                | 0.196824                    |
| Thermal correction to Enthalpy=              | 0.197768                    |
| Thermal correction to Gibbs Free Energy=     | 0.147486                    |
| Sum of electronic and zero-point Energies=   | -683.866092                 |
| Sum of electronic and thermal Energies=      | -683.855917                 |
| Sum of electronic and thermal Enthalpies=    | -683.854972                 |
| Sum of electronic and thermal Free Energies= | -683.905255                 |

| Center Number | Atomic Symbol | Coordinates (Angstroms) |           |           |
|---------------|---------------|-------------------------|-----------|-----------|
|               |               | X                       | Y         | Z         |
| 1             | C             | -0.901757               | 0.261091  | 1.590980  |
| 2             | H             | -0.262999               | 0.452758  | 2.451119  |
| 3             | C             | -0.927456               | 1.308833  | 0.410757  |
| 4             | H             | -0.654224               | 2.350621  | 0.570738  |
| 5             | C             | -0.172773               | 0.305972  | -0.528917 |
| 6             | H             | 0.787262                | 0.493790  | -1.004049 |
| 7             | C             | -0.450580               | -0.801249 | 0.547554  |
| 8             | C             | -1.804160               | -1.151735 | -0.170292 |
| 9             | H             | -2.041617               | -2.192425 | -0.380310 |
| 10            | C             | -1.516873               | -0.042388 | -1.241535 |
| 11            | H             | -1.679482               | -0.145369 | -2.311893 |
| 12            | C             | -2.276927               | 0.959624  | -0.304968 |
| 13            | H             | 0.228840                | -1.604567 | 0.824471  |
| 14            | H             | -2.934497               | 1.760405  | -0.639224 |
| 15            | C             | -2.814808               | -0.234463 | 0.576165  |
| 16            | H             | -3.873542               | -0.483212 | 0.536301  |
| 17            | N             | -2.279295               | -0.085728 | 1.925669  |
| 18            | C             | -2.989474               | 0.620612  | 2.913796  |
| 19            | H             | -3.899943               | 1.100481  | 2.550404  |
| 20            | H             | -2.373614               | 1.346296  | 3.445334  |
| 21            | N             | -4.166256               | 0.107639  | 4.986509  |
| 22            | O             | -4.365396               | 1.306174  | 5.013586  |
| 23            | O             | -4.525599               | -0.732001 | 5.768511  |
| 24            | O             | -3.420050               | -0.404433 | 3.917847  |

Number of imaginary frequencies at the B3LYP/6-311++G(d,p) level = 0

**Table S10.** Cartesian coordinates (in Å) for optimized structure **AHC-17** obtained using the B3LYP/6-311++G(d,p) level of theory

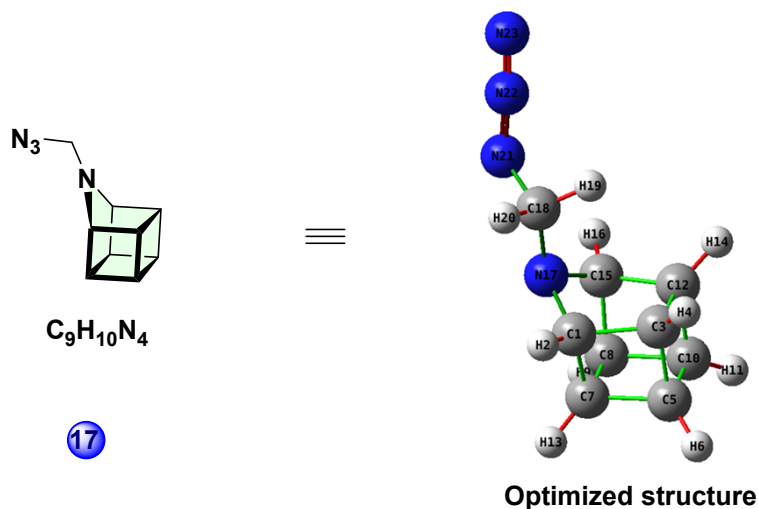

|                                              |                             |
|----------------------------------------------|-----------------------------|
| Zero-point correction=                       | 0.183390 (Hartree/Particle) |
| Thermal correction to Energy=                | 0.192526                    |
| Thermal correction to Enthalpy=              | 0.193470                    |
| Thermal correction to Gibbs Free Energy=     | 0.147222                    |
| Sum of electronic and zero-point Energies=   | -567.727732                 |
| Sum of electronic and thermal Energies=      | -567.718596                 |
| Sum of electronic and thermal Enthalpies=    | -567.717652                 |
| Sum of electronic and thermal Free Energies= | -567.763899                 |

| Center<br>Number | Atomic<br>Symbol | Coordinates (Angstroms) |           |           |
|------------------|------------------|-------------------------|-----------|-----------|
|                  |                  | X                       | Y         | Z         |
| 1                | C                | -0.716774               | -0.080938 | 1.566781  |
| 2                | H                | 0.059921                | -0.064979 | 2.330714  |
| 3                | C                | -0.890598               | 1.191452  | 0.642534  |
| 4                | H                | -0.556777               | 2.179308  | 0.955925  |
| 5                | C                | -0.327193               | 0.398260  | -0.586369 |
| 6                | H                | 0.550532                | 0.678936  | -1.164598 |
| 7                | C                | -0.466598               | -0.906327 | 0.274358  |
| 8                | C                | -1.925072               | -1.105562 | -0.270641 |
| 9                | H                | -2.228061               | -2.080061 | -0.647495 |
| 10               | C                | -1.777953               | 0.200494  | -1.127377 |
| 11               | H                | -2.110693               | 0.318370  | -2.156327 |
| 12               | C                | -2.346307               | 0.992930  | 0.100357  |
| 13               | H                | 0.226225                | -1.745234 | 0.272341  |
| 14               | H                | -3.022162               | 1.843851  | 0.035448  |
| 15               | C                | -2.772655               | -0.361233 | 0.797307  |
| 16               | H                | -3.831670               | -0.594550 | 0.880018  |
| 17               | N                | -2.029622               | -0.505858 | 2.050076  |
| 18               | C                | -2.530412               | 0.263498  | 3.163107  |
| 19               | H                | -2.730468               | 1.321149  | 2.911242  |
| 20               | H                | -1.785228               | 0.234944  | 3.965579  |
| 21               | N                | -3.788131               | -0.366693 | 3.633499  |
| 22               | N                | -4.483737               | 0.329994  | 4.367631  |
| 23               | N                | -5.206894               | 0.878308  | 5.050655  |

Number of imaginary frequencies at the B3LYP/6-311++G(d,p) level = 0

**Table S11.** Cartesian coordinates (in Å) for optimized structure **AHC-18** obtained using the B3LYP/6-311++G(d,p) level of theory

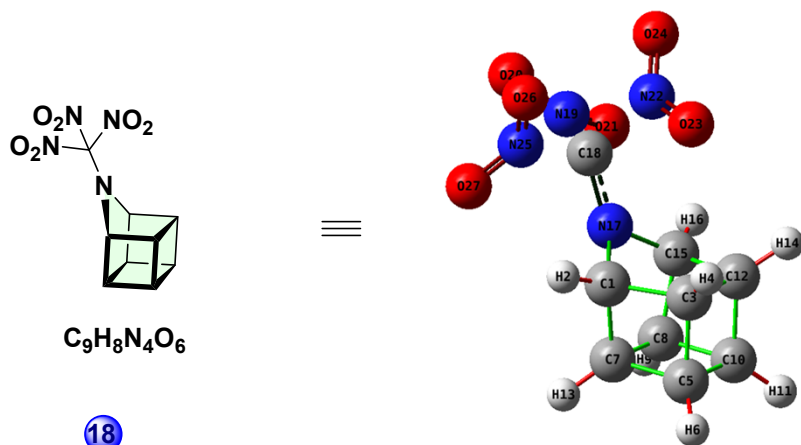

C9H8N4O6

**18**

**Optimized structure**

|                                              |                             |
|----------------------------------------------|-----------------------------|
| Zero-point correction=                       | 0.185672 (Hartree/Particle) |
| Thermal correction to Energy=                | 0.200167                    |
| Thermal correction to Enthalpy=              | 0.201111                    |
| Thermal correction to Gibbs Free Energy=     | 0.142237                    |
| Sum of electronic and zero-point Energies=   | -1017.745535                |
| Sum of electronic and thermal Energies=      | -1017.731040                |
| Sum of electronic and thermal Enthalpies=    | -1017.730096                |
| Sum of electronic and thermal Free Energies= | -1017.788970                |

| Center Number | Atomic Symbol | Coordinates (Angstroms) |           |           |
|---------------|---------------|-------------------------|-----------|-----------|
|               |               | X                       | Y         | Z         |
| 1             | C             | -0.858160               | 0.497055  | 1.401563  |
| 2             | H             | -0.222233               | 0.923398  | 2.170292  |
| 3             | C             | -1.105714               | 1.299886  | 0.084749  |
| 4             | H             | -1.009155               | 2.381717  | 0.066271  |
| 5             | C             | -0.231235               | 0.280537  | -0.727304 |
| 6             | H             | 0.671251                | 0.527791  | -1.280053 |
| 7             | C             | -0.292992               | -0.659043 | 0.528994  |
| 8             | C             | -1.593268               | -1.326612 | -0.040050 |
| 9             | H             | -1.671811               | -2.411017 | -0.060337 |
| 10            | C             | -1.525210               | -0.382900 | -1.292154 |
| 11            | H             | -1.708039               | -0.690268 | -2.318461 |
| 12            | C             | -2.402924               | 0.635291  | -0.481381 |
| 13            | H             | 0.512987                | -1.288276 | 0.899009  |
| 14            | H             | -3.188731               | 1.264730  | -0.890507 |
| 15            | C             | -2.724590               | -0.463768 | 0.586368  |
| 16            | H             | -3.724583               | -0.874822 | 0.645414  |
| 17            | N             | -2.166978               | -0.010049 | 1.884470  |
| 18            | C             | -2.880011               | 0.498291  | 2.920267  |
| 19            | N             | -3.882388               | -0.536190 | 3.576173  |
| 20            | O             | -3.916605               | -0.563550 | 4.784358  |
| 21            | O             | -4.522413               | -1.217972 | 2.803924  |
| 22            | N             | -3.834057               | 1.775296  | 2.598071  |
| 23            | O             | -3.367449               | 2.548143  | 1.788465  |
| 24            | O             | -4.914398               | 1.827223  | 3.138887  |
| 25            | N             | -1.951199               | 0.979436  | 4.079028  |
| 26            | O             | -2.165077               | 2.082475  | 4.530589  |
| 27            | O             | -1.096317               | 0.191830  | 4.418534  |

Number of imaginary frequencies at the B3LYP/6-311++G(d,p) level = 0

**Table S12.** Cartesian coordinates (in Å) for optimized structure **AHC-19** obtained using the B3LYP/6-311++G(d,p) level of theory

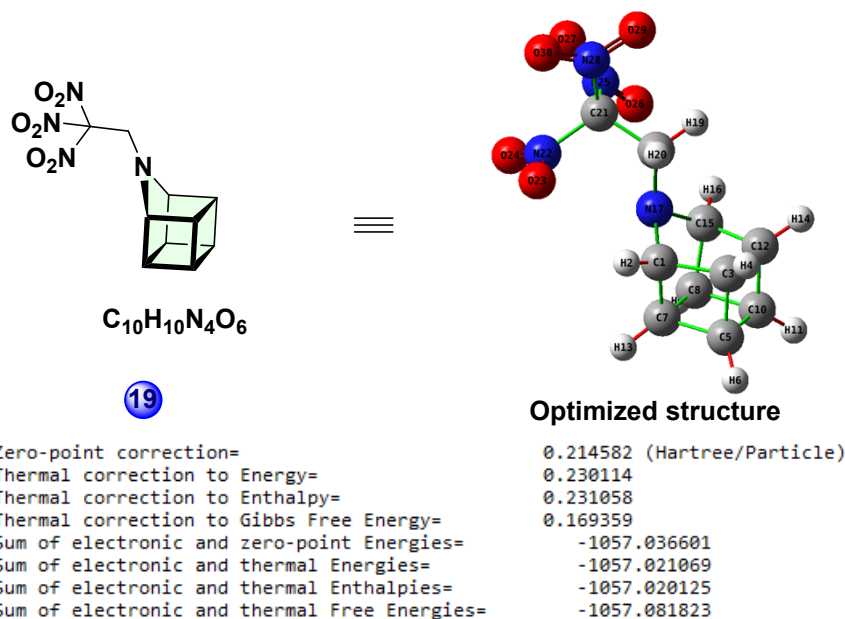

| Center Number | Atomic Symbol | Coordinates (Angstroms) |           |           |
|---------------|---------------|-------------------------|-----------|-----------|
|               |               | X                       | Y         | Z         |
| 1             | C             | -0.924356               | 0.104753  | 1.682634  |
| 2             | H             | -0.344487               | 0.250442  | 2.591508  |
| 3             | C             | -0.944996               | 1.251204  | 0.600355  |
| 4             | H             | -0.735612               | 2.287421  | 0.860903  |
| 5             | C             | -0.083974               | 0.371742  | -0.372120 |
| 6             | H             | 0.889357                | 0.648578  | -0.770302 |
| 7             | C             | -0.359719               | -0.838689 | 0.587680  |
| 8             | C             | -1.648079               | -1.193232 | -0.237082 |
| 9             | H             | -1.817492               | -2.221439 | -0.548717 |
| 10            | C             | -1.364360               | 0.019413  | -1.191856 |
| 11            | H             | -1.460308               | 0.002898  | -2.274922 |
| 12            | C             | -2.230024               | 0.896980  | -0.222167 |
| 13            | H             | 0.348829                | -1.624823 | 0.838662  |
| 14            | H             | -2.910905               | 1.688238  | -0.531694 |
| 15            | C             | -2.747080               | -0.396859 | 0.515571  |
| 16            | H             | -3.783670               | -0.695237 | 0.388022  |
| 17            | N             | -2.303101               | -0.349494 | 1.915349  |
| 18            | C             | -3.094772               | 0.453047  | 2.829880  |
| 19            | H             | -3.961979               | 0.918524  | 2.357287  |
| 20            | H             | -2.503675               | 1.254688  | 3.281241  |
| 21            | C             | -3.624352               | -0.397257 | 3.996988  |
| 22            | N             | -2.520091               | -1.338738 | 4.512188  |
| 23            | O             | -1.488551               | -0.772742 | 4.808755  |
| 24            | O             | -2.757613               | -2.522930 | 4.557658  |
| 25            | N             | -4.859878               | -1.262975 | 3.642878  |
| 26            | O             | -5.032848               | -1.500635 | 2.467038  |
| 27            | O             | -5.540616               | -1.625337 | 4.577332  |
| 28            | N             | -4.095951               | 0.492656  | 5.162626  |
| 29            | O             | -4.842447               | 1.390222  | 4.814347  |
| 30            | O             | -3.707655               | 0.246029  | 6.279368  |

Number of imaginary frequencies at the B3LYP/6-311++G(d,p) level = 0



**Table S13.** Cartesian coordinates (in Å) for optimized structure **AHC-20** obtained using the B3LYP/6-311++G(d,p) level of theory

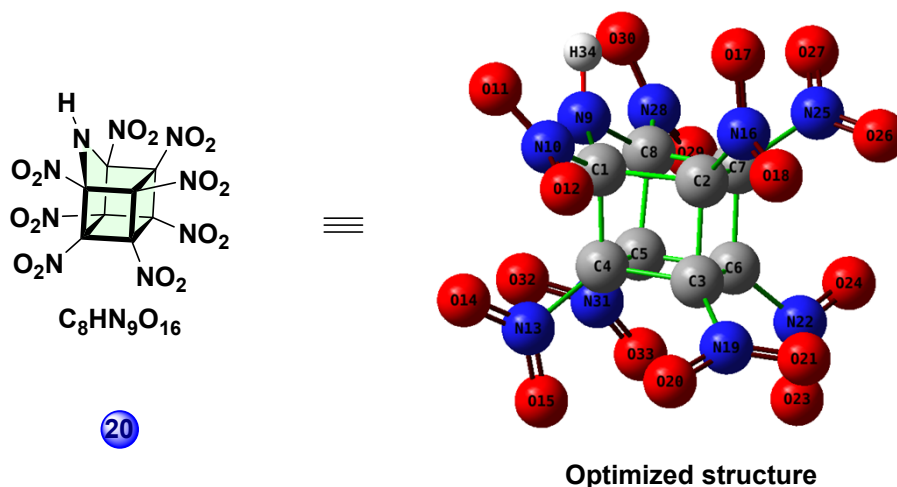

```

Zero-point correction=                0.166728 (Hartree/Particle)
Thermal correction to Energy=         0.194315
Thermal correction to Enthalpy=       0.195259
Thermal correction to Gibbs Free Energy= 0.107722
Sum of electronic and zero-point Energies= -2001.177272
Sum of electronic and thermal Energies= -2001.149685
Sum of electronic and thermal Enthalpies= -2001.148741
Sum of electronic and thermal Free Energies= -2001.236278
  
```

| Center Number | Atomic Symbol | Coordinates (Angstroms) |           |           |
|---------------|---------------|-------------------------|-----------|-----------|
|               |               | X                       | Y         | Z         |
| 1             | C             | -0.981703               | -0.186737 | 1.654706  |
| 2             | C             | -0.821840               | 1.093684  | 0.701071  |
| 3             | C             | -0.164072               | 0.242893  | -0.432008 |
| 4             | C             | -0.586065               | -1.022426 | 0.388272  |
| 5             | C             | -1.949745               | -1.035527 | -0.389817 |
| 6             | C             | -1.522583               | 0.238702  | -1.187148 |
| 7             | C             | -2.193395               | 1.074308  | -0.049642 |
| 8             | C             | -2.865964               | -0.223178 | 0.599132  |
| 9             | N             | -2.351556               | -0.457673 | 1.903778  |
| 10            | N             | -0.076668               | -0.200298 | 2.862324  |
| 11            | O             | -0.579450               | -0.485894 | 3.923685  |
| 12            | O             | 1.075270                | 0.117935  | 2.632341  |
| 13            | N             | 0.196937                | -2.302218 | 0.466345  |
| 14            | O             | 0.499630                | -2.696274 | 1.570615  |
| 15            | O             | 0.435052                | -2.812676 | -0.609846 |
| 16            | N             | -0.331263               | 2.376464  | 1.286867  |
| 17            | O             | -1.070111               | 2.821960  | 2.152815  |
| 18            | O             | 0.716970                | 2.824654  | 0.891420  |
| 19            | N             | 1.179898                | 0.520710  | -1.018505 |
| 20            | O             | 2.097149                | -0.160949 | -0.609712 |
| 21            | O             | 1.209519                | 1.422686  | -1.827858 |
| 22            | N             | -1.737236               | 0.419914  | -2.653331 |
| 23            | O             | -0.890124               | -0.069125 | -3.367856 |
| 24            | O             | -2.748142               | 1.013152  | -2.971710 |
| 25            | N             | -2.913262               | 2.374427  | -0.258904 |
| 26            | O             | -2.259974               | 3.236674  | -0.810417 |
| 27            | O             | -4.054383               | 2.439293  | 0.145931  |
| 28            | N             | -4.360385               | -0.384243 | 0.468081  |
| 29            | O             | -4.763896               | -0.554552 | -0.666428 |

|    |   |           |           |           |
|----|---|-----------|-----------|-----------|
| 30 | O | -5.001223 | -0.315355 | 1.491646  |
| 31 | N | -2.449033 | -2.326410 | -0.976114 |
| 32 | O | -2.704876 | -3.180399 | -0.148082 |
| 33 | O | -2.556693 | -2.383570 | -2.178039 |
| 34 | H | -2.800353 | 0.033255  | 2.674087  |

Number of imaginary frequencies at the B3LYP/6-311++G(d,p) level = 0

**Table S14.** Cartesian coordinates (in Å) for optimized structure **AHC-21** obtained using the B3LYP/6-311++G(d,p) level of theory

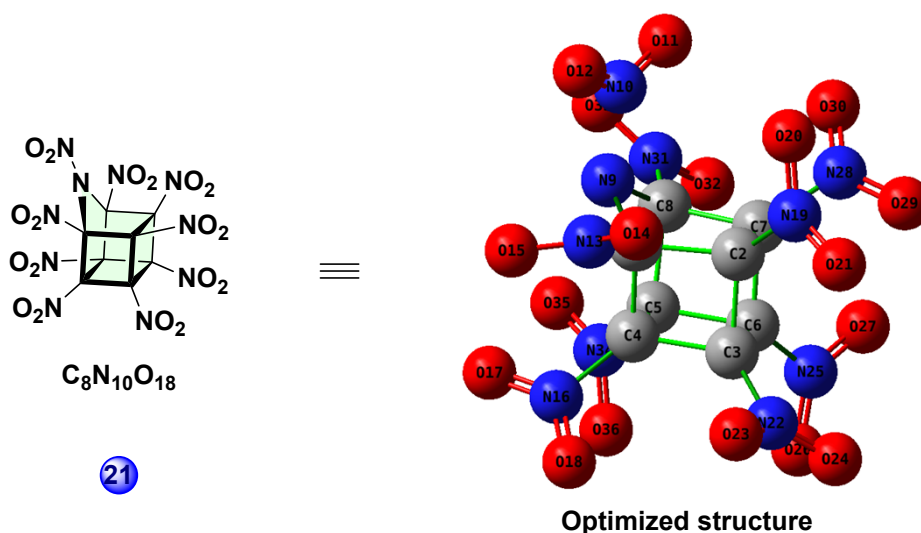

|                                              |                             |
|----------------------------------------------|-----------------------------|
| Zero-point correction=                       | 0.167327 (Hartree/Particle) |
| Thermal correction to Energy=                | 0.197563                    |
| Thermal correction to Enthalpy=              | 0.198508                    |
| Thermal correction to Gibbs Free Energy=     | 0.104960                    |
| Sum of electronic and zero-point Energies=   | -2205.669024                |
| Sum of electronic and thermal Energies=      | -2205.638788                |
| Sum of electronic and thermal Enthalpies=    | -2205.637843                |
| Sum of electronic and thermal Free Energies= | -2205.731391                |

| Center Number | Atomic Symbol | Coordinates (Angstroms) |           |           |
|---------------|---------------|-------------------------|-----------|-----------|
|               |               | X                       | Y         | Z         |
| 1             | C             | -0.911599               | -0.158132 | 1.636565  |
| 2             | C             | -0.848453               | 1.121039  | 0.708751  |
| 3             | C             | -0.206222               | 0.308403  | -0.463627 |
| 4             | C             | -0.570365               | -0.983715 | 0.349856  |
| 5             | C             | -1.967289               | -1.029028 | -0.344647 |
| 6             | C             | -1.595835               | 0.258899  | -1.167575 |
| 7             | C             | -2.252640               | 1.070003  | -0.005396 |
| 8             | C             | -2.880183               | -0.226776 | 0.645262  |
| 9             | N             | -2.298019               | -0.457396 | 1.958379  |
| 10            | N             | -2.836848               | 0.428943  | 3.074613  |
| 11            | O             | -3.805528               | 1.078236  | 2.801272  |
| 12            | O             | -2.227129               | 0.323501  | 4.100077  |
| 13            | N             | 0.097775                | -0.294480 | 2.782999  |
| 14            | O             | 0.759880                | 0.690510  | 3.027230  |
| 15            | O             | 0.154630                | -1.389571 | 3.288417  |
| 16            | N             | 0.188479                | -2.290248 | 0.452589  |
| 17            | O             | -0.459392               | -3.199836 | 0.928509  |
| 18            | O             | 1.333185                | -2.297836 | 0.065823  |

|    |   |           |           |           |
|----|---|-----------|-----------|-----------|
| 19 | N | -0.403064 | 2.454703  | 1.244494  |
| 20 | O | -1.124796 | 2.882519  | 2.126523  |
| 21 | O | 0.578056  | 2.959272  | 0.758339  |
| 22 | N | 1.132648  | 0.674125  | -1.018317 |
| 23 | O | 2.060834  | 0.496375  | -0.258704 |
| 24 | O | 1.144268  | 1.149979  | -2.132891 |
| 25 | N | -1.884587 | 0.421549  | -2.629025 |
| 26 | O | -1.197595 | -0.251706 | -3.366239 |
| 27 | O | -2.782317 | 1.184821  | -2.919937 |
| 28 | N | -2.961658 | 2.385233  | -0.228387 |
| 29 | O | -2.259703 | 3.225300  | -0.760947 |
| 30 | O | -4.109397 | 2.480682  | 0.127703  |
| 31 | N | -4.364778 | -0.499275 | 0.456643  |
| 32 | O | -4.750149 | -0.241120 | -0.668310 |
| 33 | O | -4.980298 | -0.969549 | 1.375774  |
| 34 | N | -2.385211 | -2.347212 | -0.955487 |
| 35 | O | -3.394388 | -2.860556 | -0.532440 |
| 36 | O | -1.629625 | -2.755776 | -1.813769 |

Number of imaginary frequencies at the B3LYP/6-311++G(d,p) level = 0

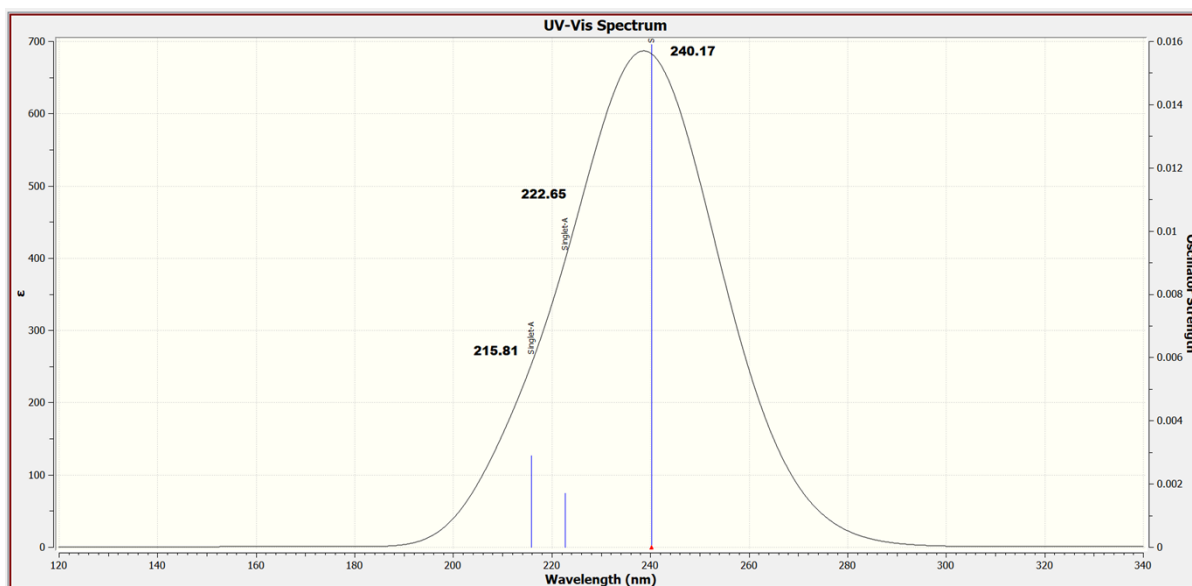

**Figure S4.** Computed UV- spectrum for compound **AHC-12**.

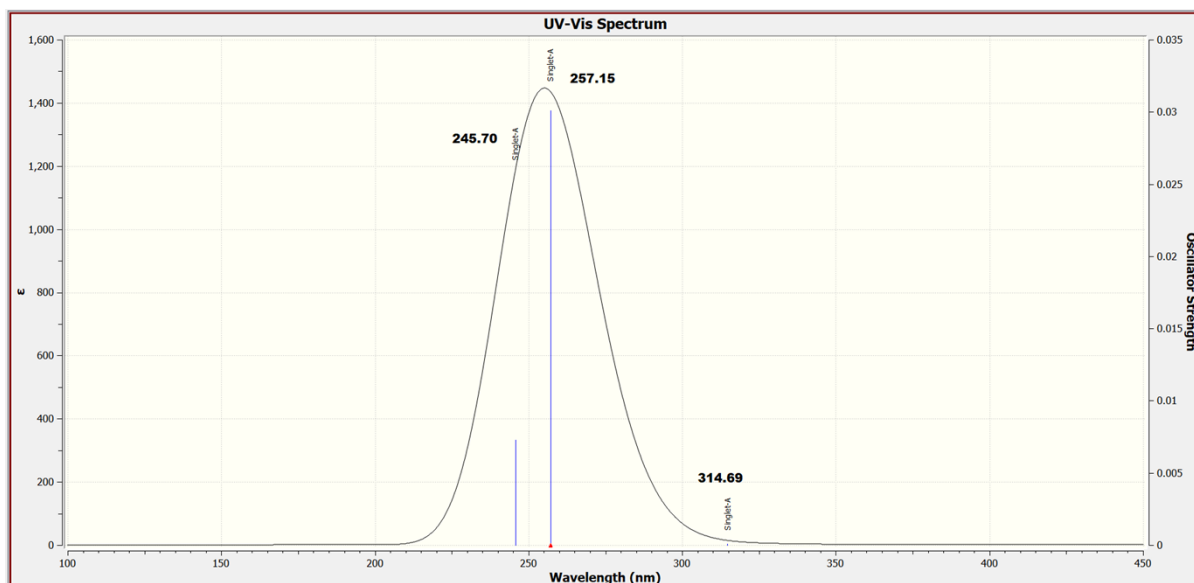

**Figure S5.** Computed UV- spectrum for compound AHC-13.

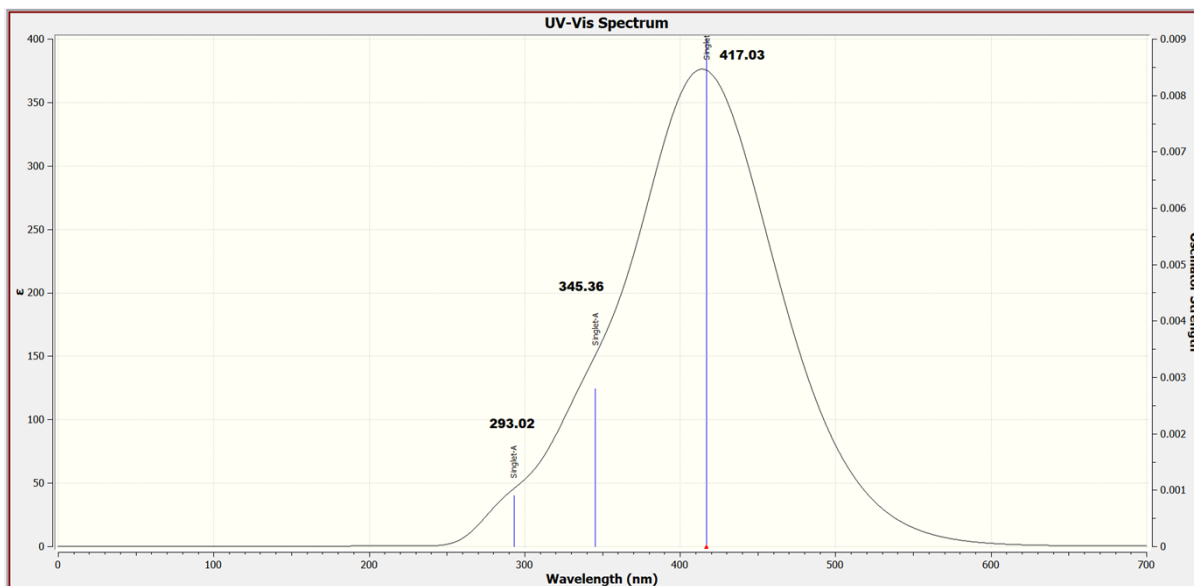

**Figure S6.** Computed UV- spectrum for compound AHC-14.

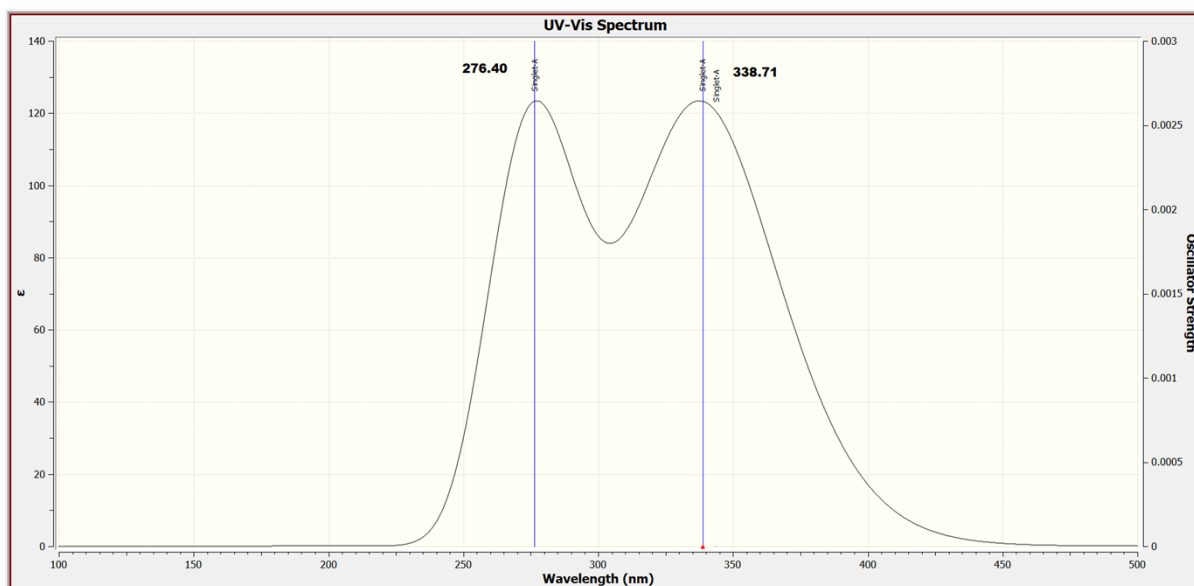

**Figure S7.** Computed UV- spectrum for compound AHC-15.

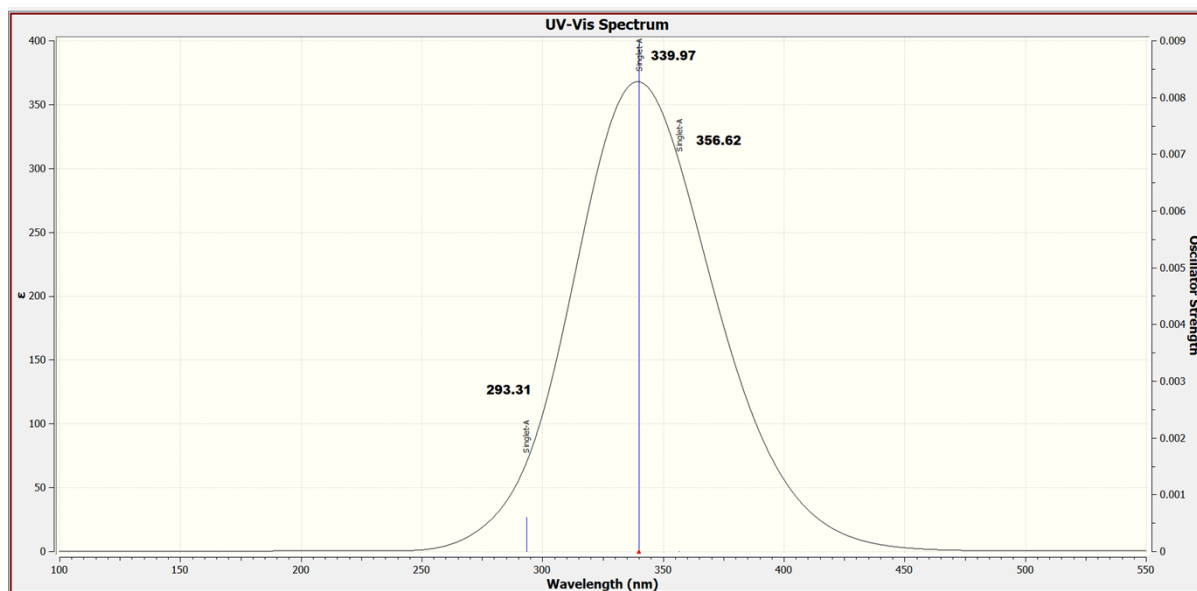

**Figure S8.** Computed UV- spectrum for compound AHC-16.

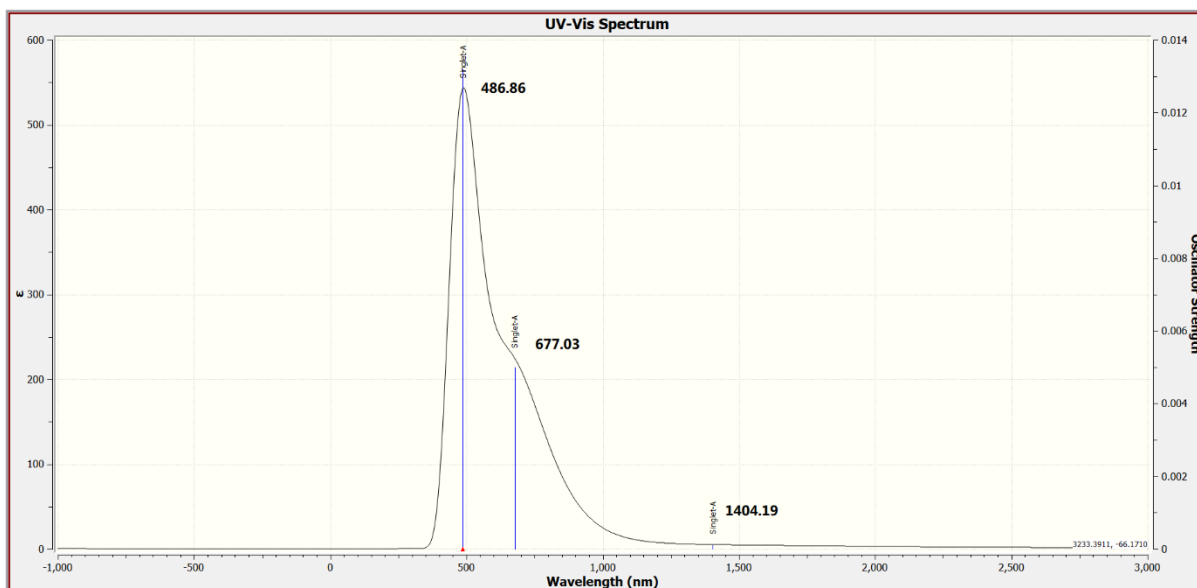

**Figure S9.** Computed UV- spectrum for compound AHC-17.

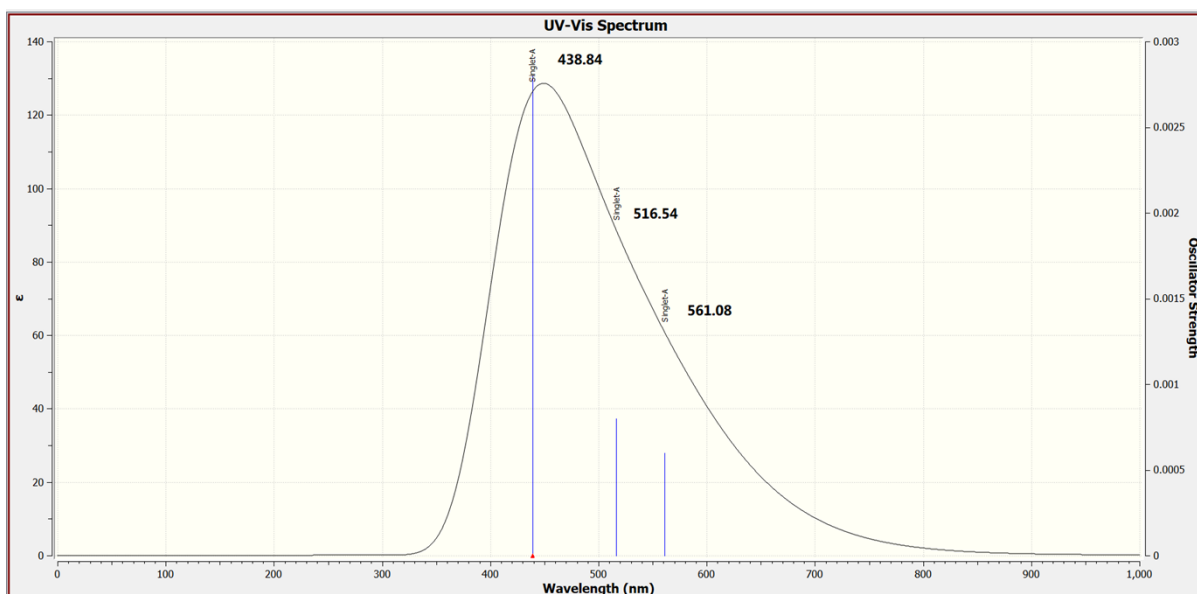

**Figure S10.** Computed UV- spectrum for compound AHC-18.

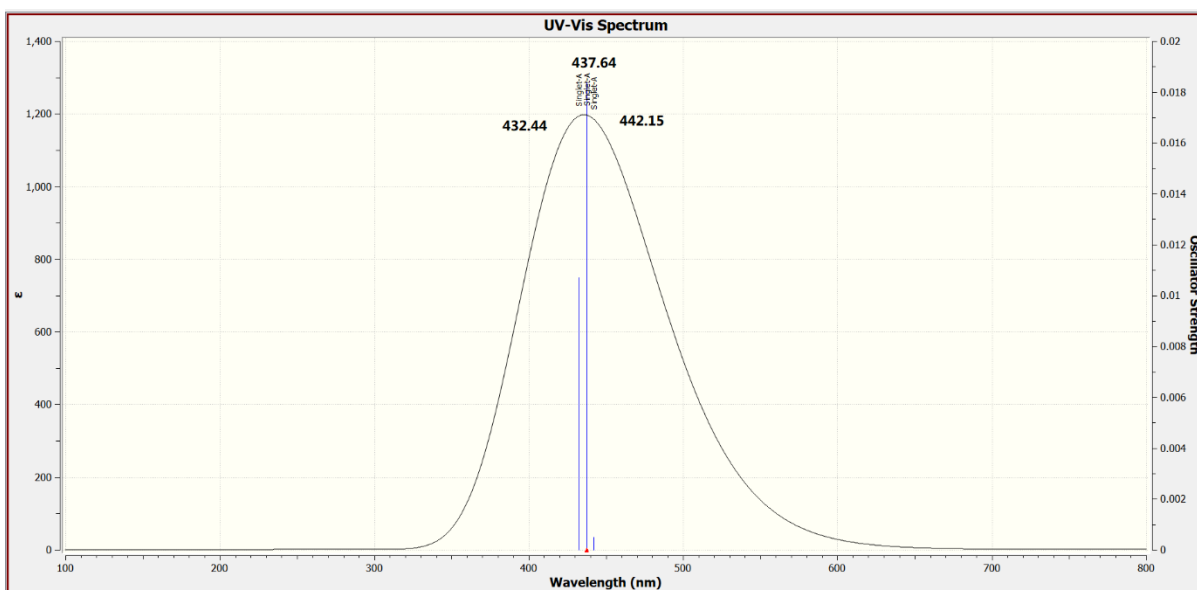

**Figure S11.** Computed UV- spectrum for compound AHC-19.

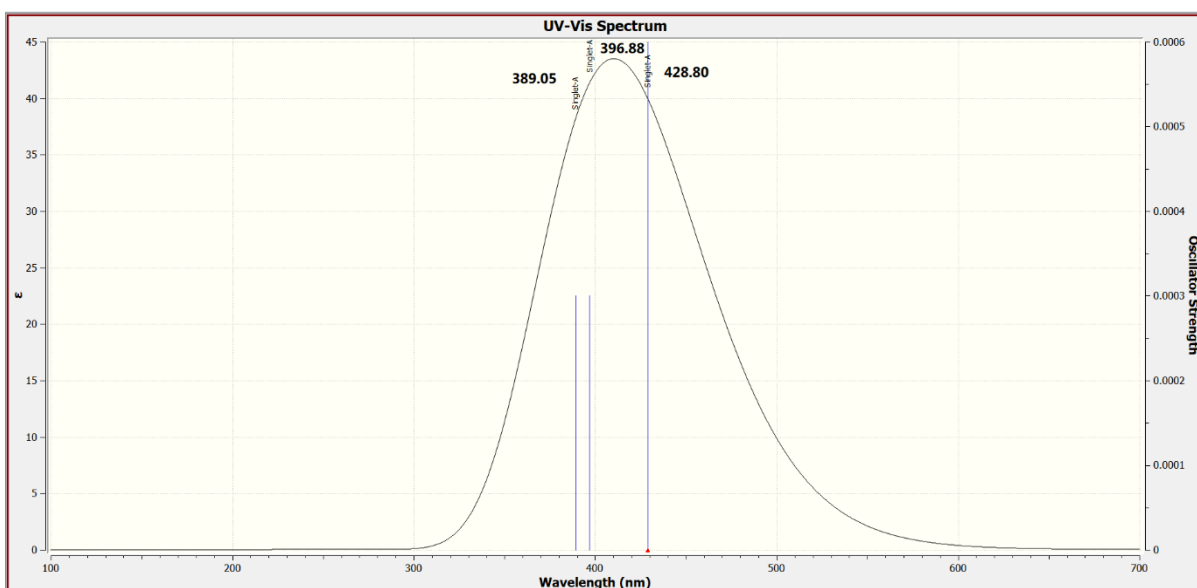

**Figure S12.** Computed UV- spectrum for compound AHC-20.

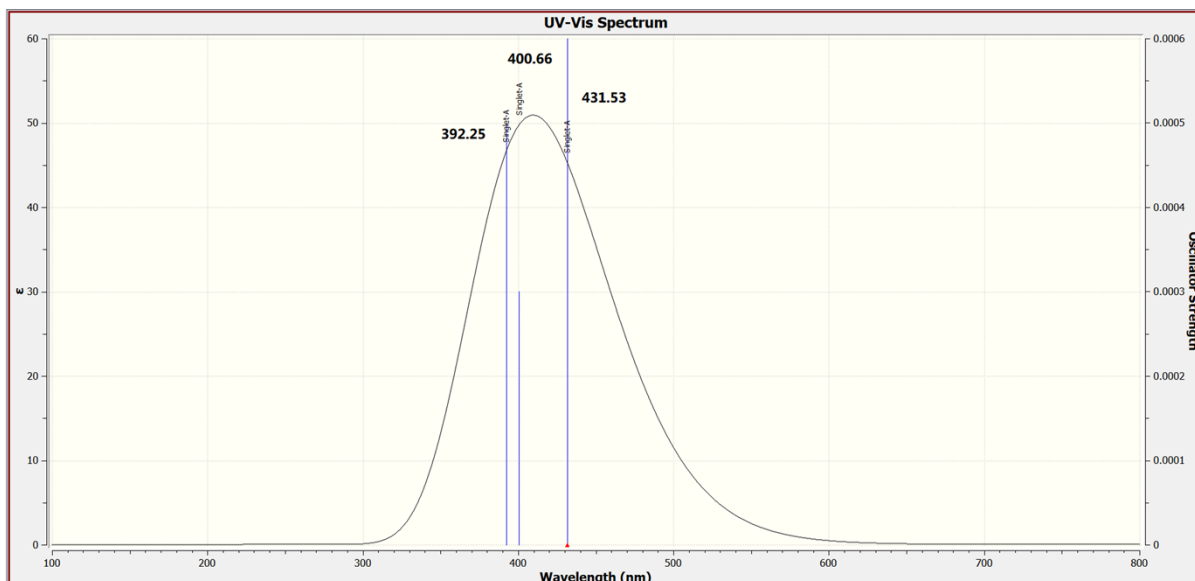

**Figure S13.** Computed UV- spectrum for compound AHC-21.

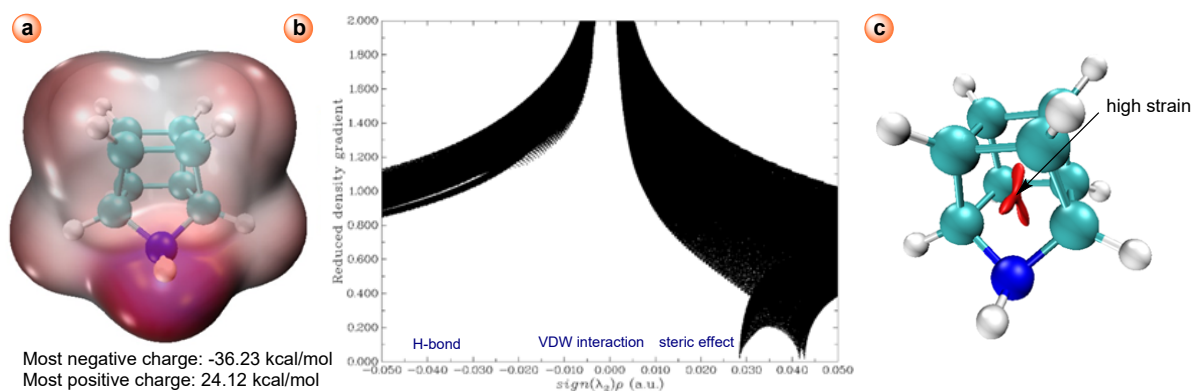

**Figure S14.** Computed electrostatic potential (ESP) maps of AHC-12. Scatter diagram of AHC-12. Reduced density gradient (RDG) of AHC-12, calculated at B3LYP/6-311++G(d,p) level.

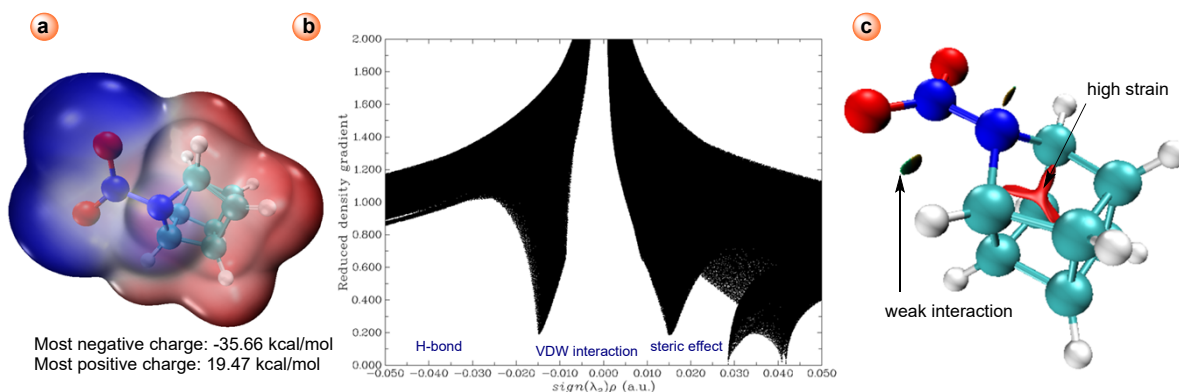

**Figure S15.** Computed electrostatic potential (ESP) maps of AHC-13. Scatter diagram of AHC-13. Reduced density gradient (RDG) of AHC-13, calculated at B3LYP/6-311++G(d,p) level.



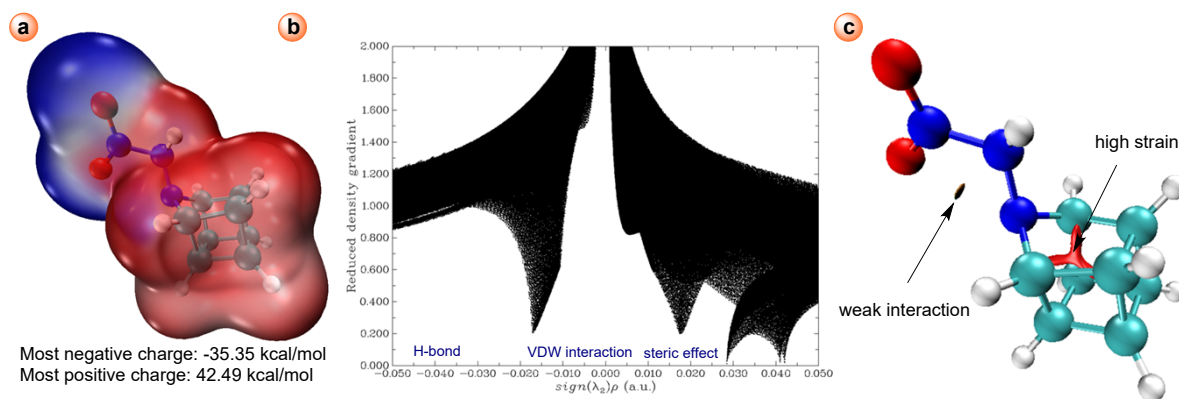

**Figure S16.** Computed electrostatic potential (ESP) maps of AHC-14. Scatter diagram of AHC-14. Reduced density gradient (RDG) of AHC-14, calculated at B3LYP/6-311++G(d,p) level.

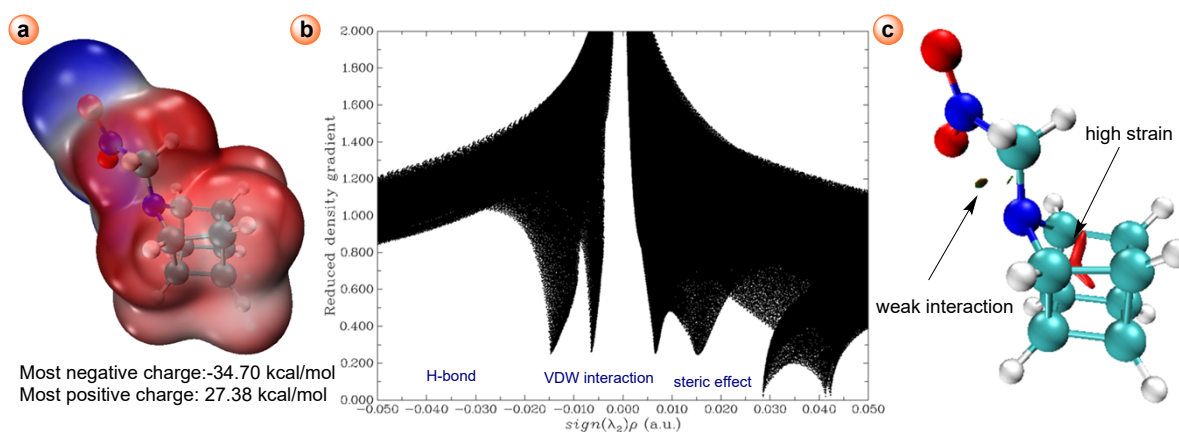

**Figure S17.** Computed electrostatic potential (ESP) maps of AHC-15. Scatter diagram of AHC-15. Reduced density gradient (RDG) of AHC-15, calculated at B3LYP/6-311++G(d,p) level.

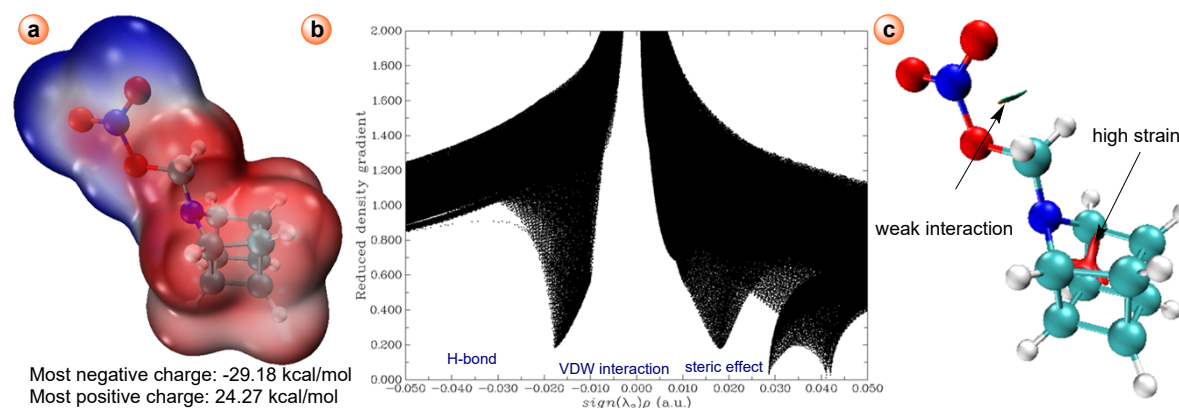

**Figure S18.** Computed electrostatic potential (ESP) maps of AHC-16. Scatter diagram of AHC-16. Reduced density gradient (RDG) of AHC-16, calculated at B3LYP/6-311++G(d,p) level.

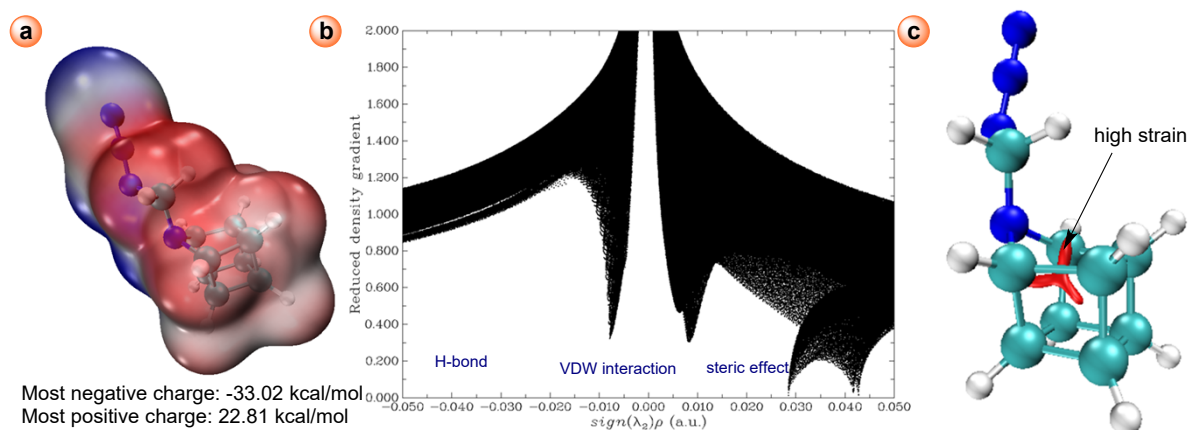

**Figure S19.** Computed electrostatic potential (ESP) maps of AHC-17. Scatter diagram of AHC-17. Reduced density gradient (RDG) of AHC-17, calculated at B3LYP/6-311++G(d,p) level.

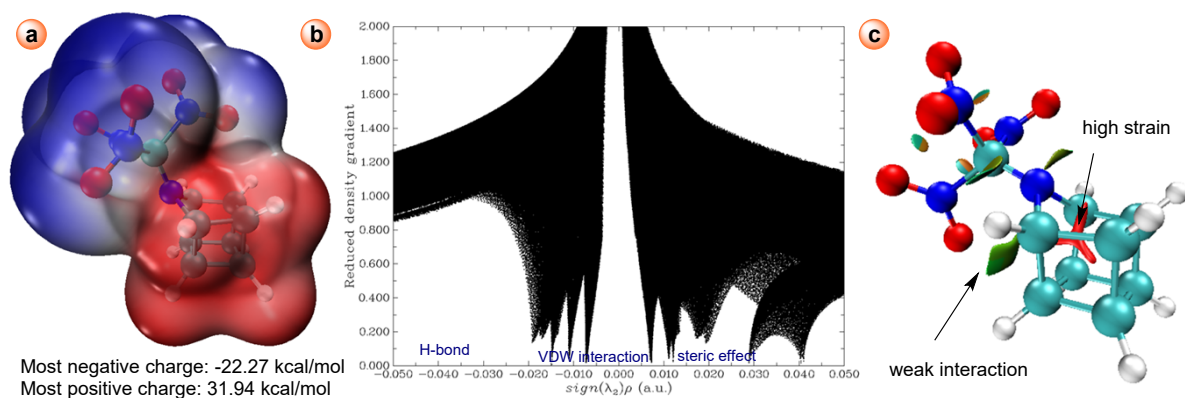

**Figure S20.** Computed electrostatic potential (ESP) maps of AHC-18. Scatter diagram of AHC-18. Reduced density gradient (RDG) of AHC-18, calculated at B3LYP/6-311++G(d,p) level.

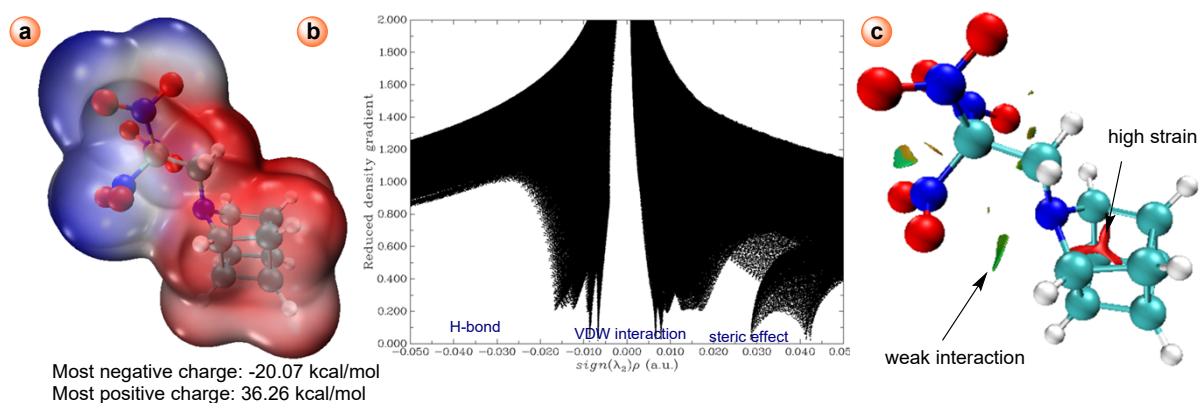

**Figure S21.** Computed electrostatic potential (ESP) maps of **AHC-19**. Scatter diagram of **AHC-19**. Reduced density gradient (RDG) of **AHC-19**, calculated at B3LYP/6-311++G(d,p) level.

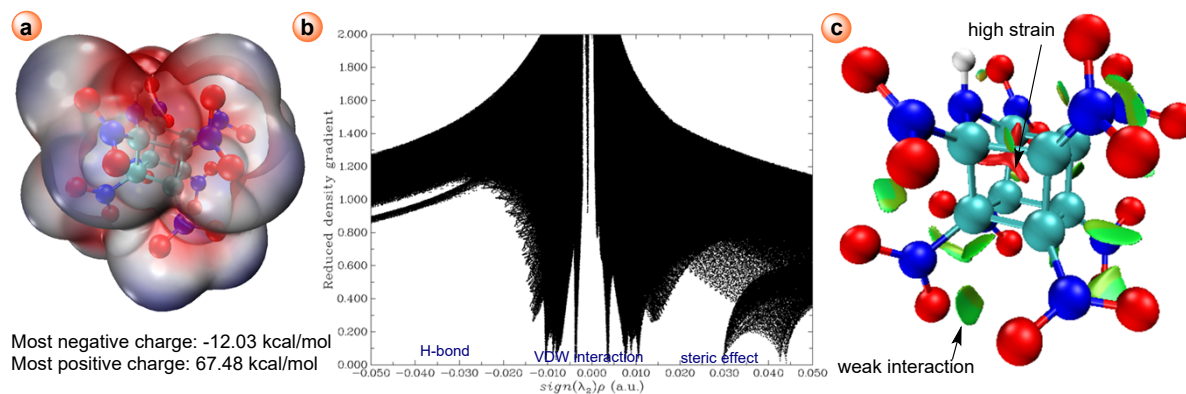

**Figure S22.** Computed electrostatic potential (ESP) maps of **AHC-20**. Scatter diagram of **AHC-20**. Reduced density gradient (RDG) of **AHC-20**, calculated at B3LYP/6-311++G(d,p) level.

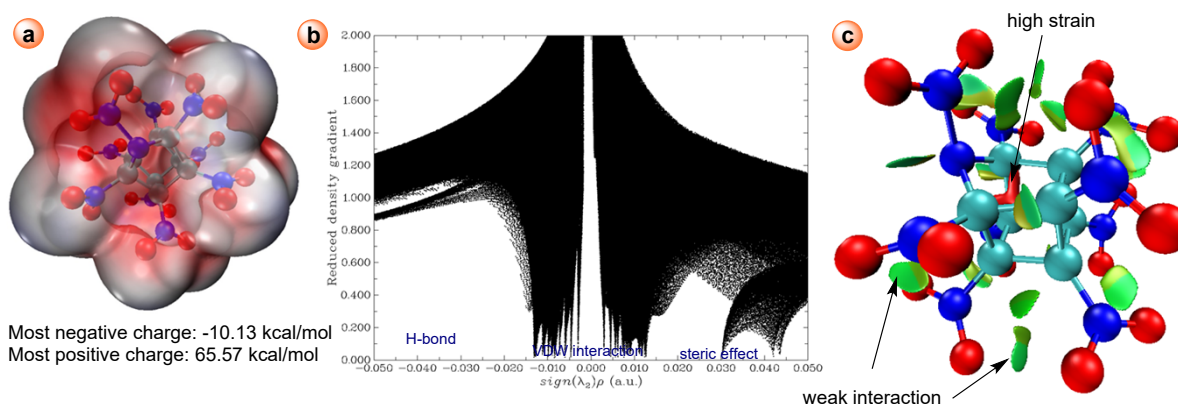

**Figure S23.** Computed electrostatic potential (ESP) maps of **AHC-21**. Scatter diagram of **AHC-21**. Reduced density gradient (RDG) of **AHC-21**, calculated at B3LYP/6-311++G(d,p) level.

## References

1. M. J. Frisch, G. W. Trucks, H. B. Schlegel, G. E. Scuseria, M. A. Robb, J. R. Cheeseman, G. Scalmani, V. Barone, B. Mennucci, G. A. Petersson, H. Nakatsuji, M. L. Caricato, X., H. P. Hratchian, A. F. Izmaylov, J. Bloino, G. Zheng, J. L. Sonnenberg, M. Hada, M. Ehara, K. Toyota, R. Fukuda, J. Hasegawa, M. Ishida, T. Nakajima, Y. Honda, O. Kitao, H. Nakai, T. Vreven, J. A. Montgomery, Jr., J. E. Peralta, F. Ogliaro, M. Bearpark, J. J. Heyd, E. Brothers, K. N. Kudin, V. N.

Staroverov, R. Kobayashi, J. Normand, K. Raghavachari, A. Rendell, J. C. Burant, S. S. Iyengar, J. Tomasi, M. Cossi, N. Rega, N. J. Millam, M. Klene, J. E. Knox, J. B. Cross, V. Bakken, C. Adamo, J. Jaramillo, R. Gomperts, R. E. Stratmann, O. Yazyev, A. J. Austin, R. Cammi, C. Pomelli, J. W. Ochterski, R. L. Martin, K. Morokuma, V. G. Zakrzewski, G. A. Voth, P. Salvador, J. J. Dannenberg, S. Dapprich, A. D. Daniels, Ö. Farkas, J. B. Foresman, J. V. Ortiz, J. Cioslowski and D. J. Fox, Revision D.01 ed., Gaussian, Inc., Wallingford, CT, 2003.

2. P. W. Atkins, Physical Chemistry, Oxford University press: Oxford 1982.
3. E. F. C. Byrd and B. M. Rice, *J. Phys. Chem. A.*, 2006, **110**, 1005-1013.
4. P. Politzer, P. Lane, J. S. Murray, *Cent. Eur. J. Energy Mater.*, 2013, **10**, 37-52.
5. M. Pospisil, P. Vavra, M. C. Concha, J. S. Murray, P. Politzer, *J. Mol. Model.*, 2010, **16**, 895-901.
